# Supplementary material
Source: PubMed Central journal article supplement (PMC5983315)
Supplement: jci-128-91786-s183.pdf [file jci-128-91786-s183.pdf]

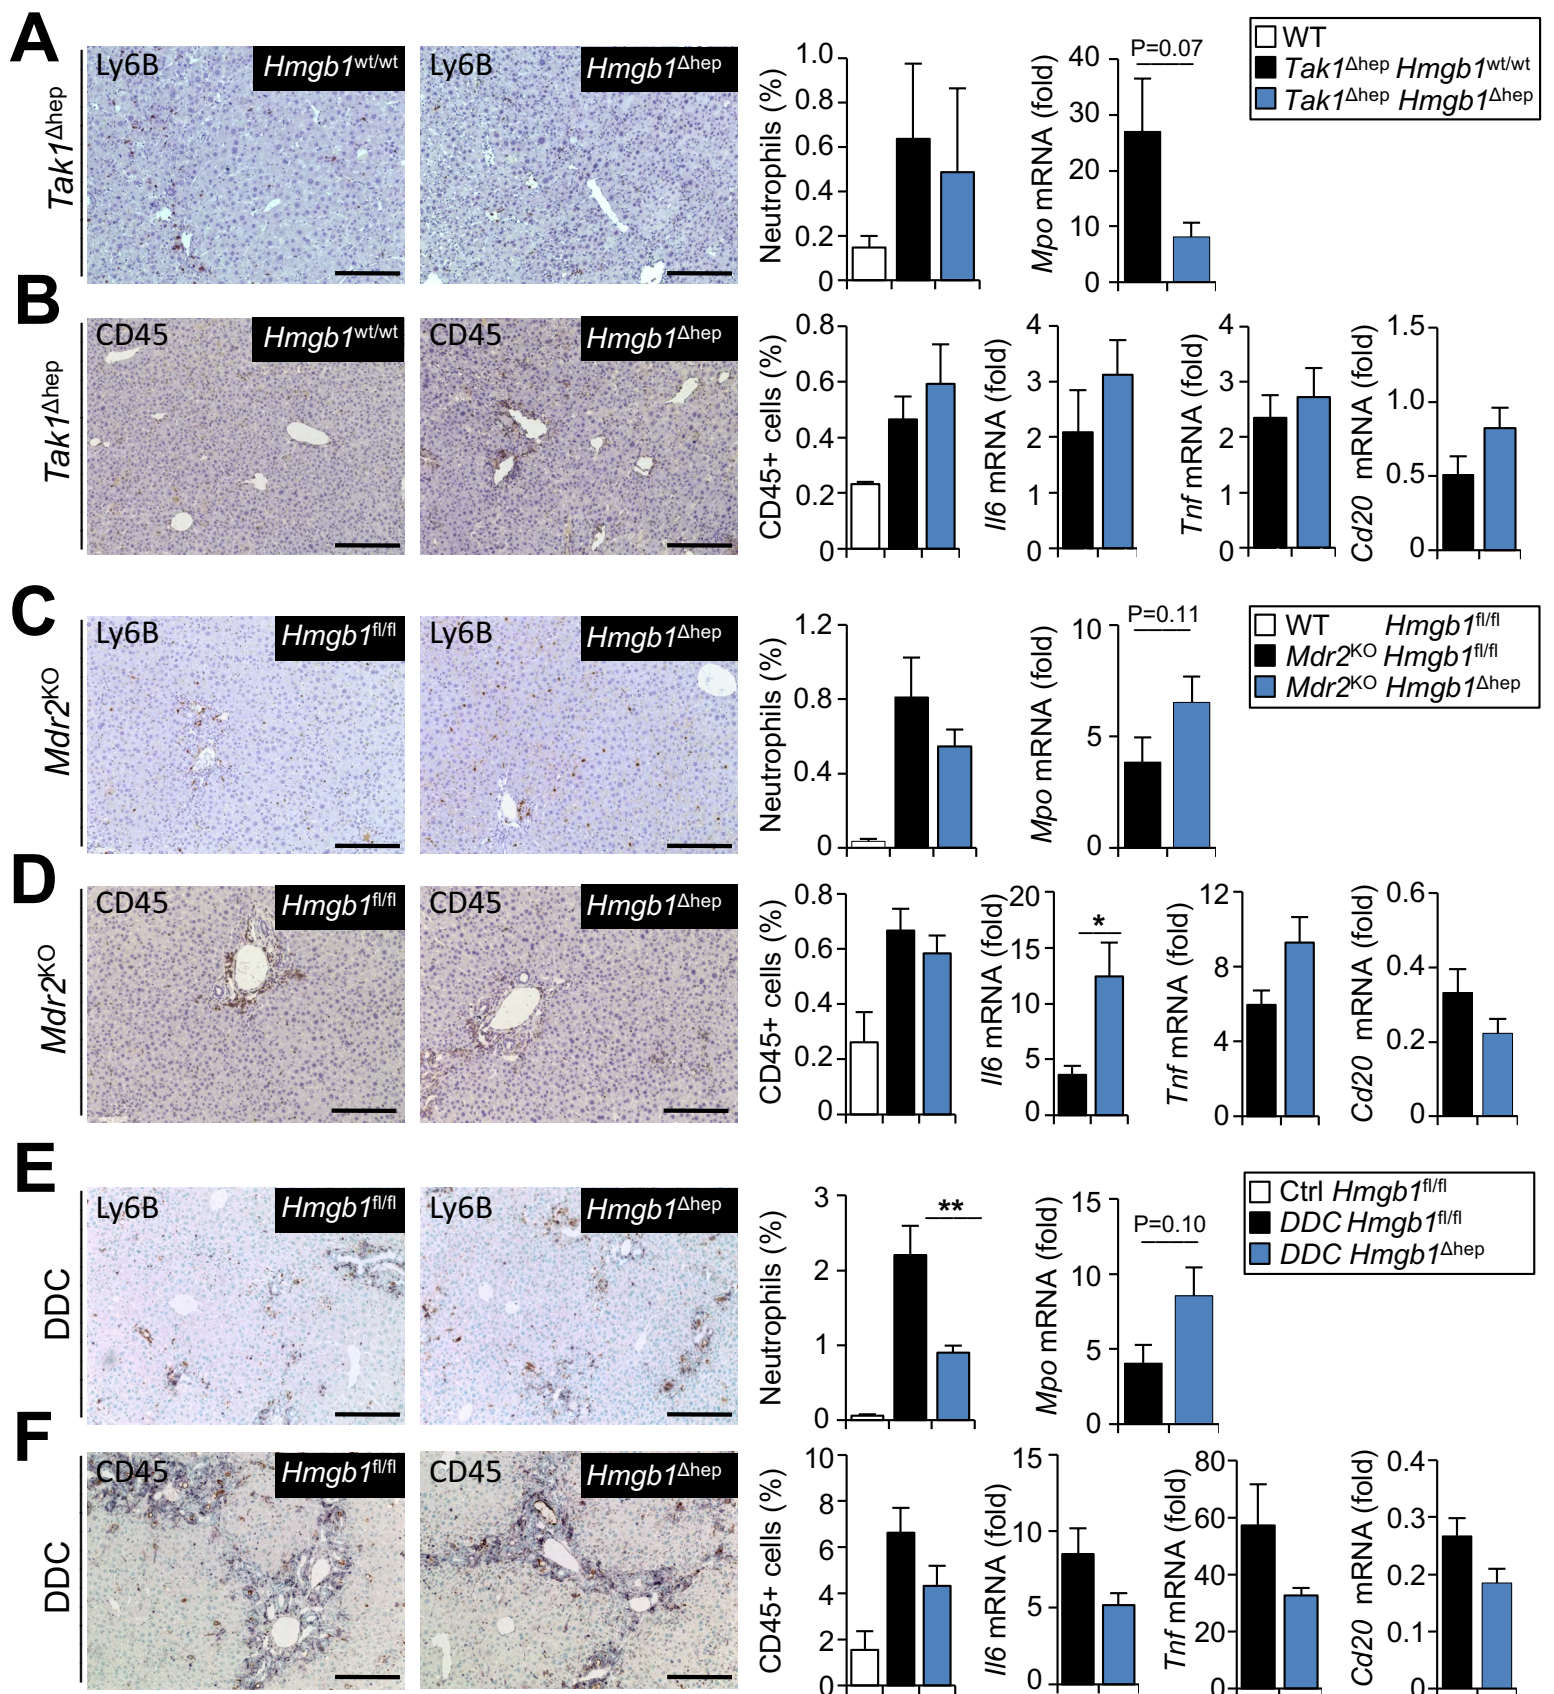

**Supplementary Figure 1. Effect of HMGB1 deletion on neutrophil infiltration and inflammation in chronic liver injury.** A-B. Ly6+ neutrophil and CD45+ leukocyte infiltration were determined by immunohistochemistry and Mpo qPCR, inflammation was determined by qPCR for *Il6*, *Tnf* and *Cd20* in *Hmgb1<sup>wt/wt</sup>* and *Hmgb1<sup>Δhep</sup>* mice in the *Tak1<sup>Δhep</sup>* (n=9 and n=9 mice, respectively). C-D. Ly6+ neutrophil and CD45+ leukocyte infiltration were determined by immunohistochemistry and Mpo qPCR, inflammation was determined by qPCR for *Il6*, *Tnf* and *Cd20* in the *Mdr2<sup>KO</sup>* model (n=10 and n=13 mice, respectively). E-F. Ly6+ neutrophil and CD45+ leukocyte infiltration were determined by immunohistochemistry and Mpo qPCR, inflammation was determined by qPCR for *Il6*, *Tnf* and *Cd20* in the DDC diet model (n=6 and n=9 mice, respectively). Data are expressed as means ± SEM. Statistical significance was determined by two-tailed t-test. \* p<0.05; \*\* p<0.01. Scale bar 100 μm.

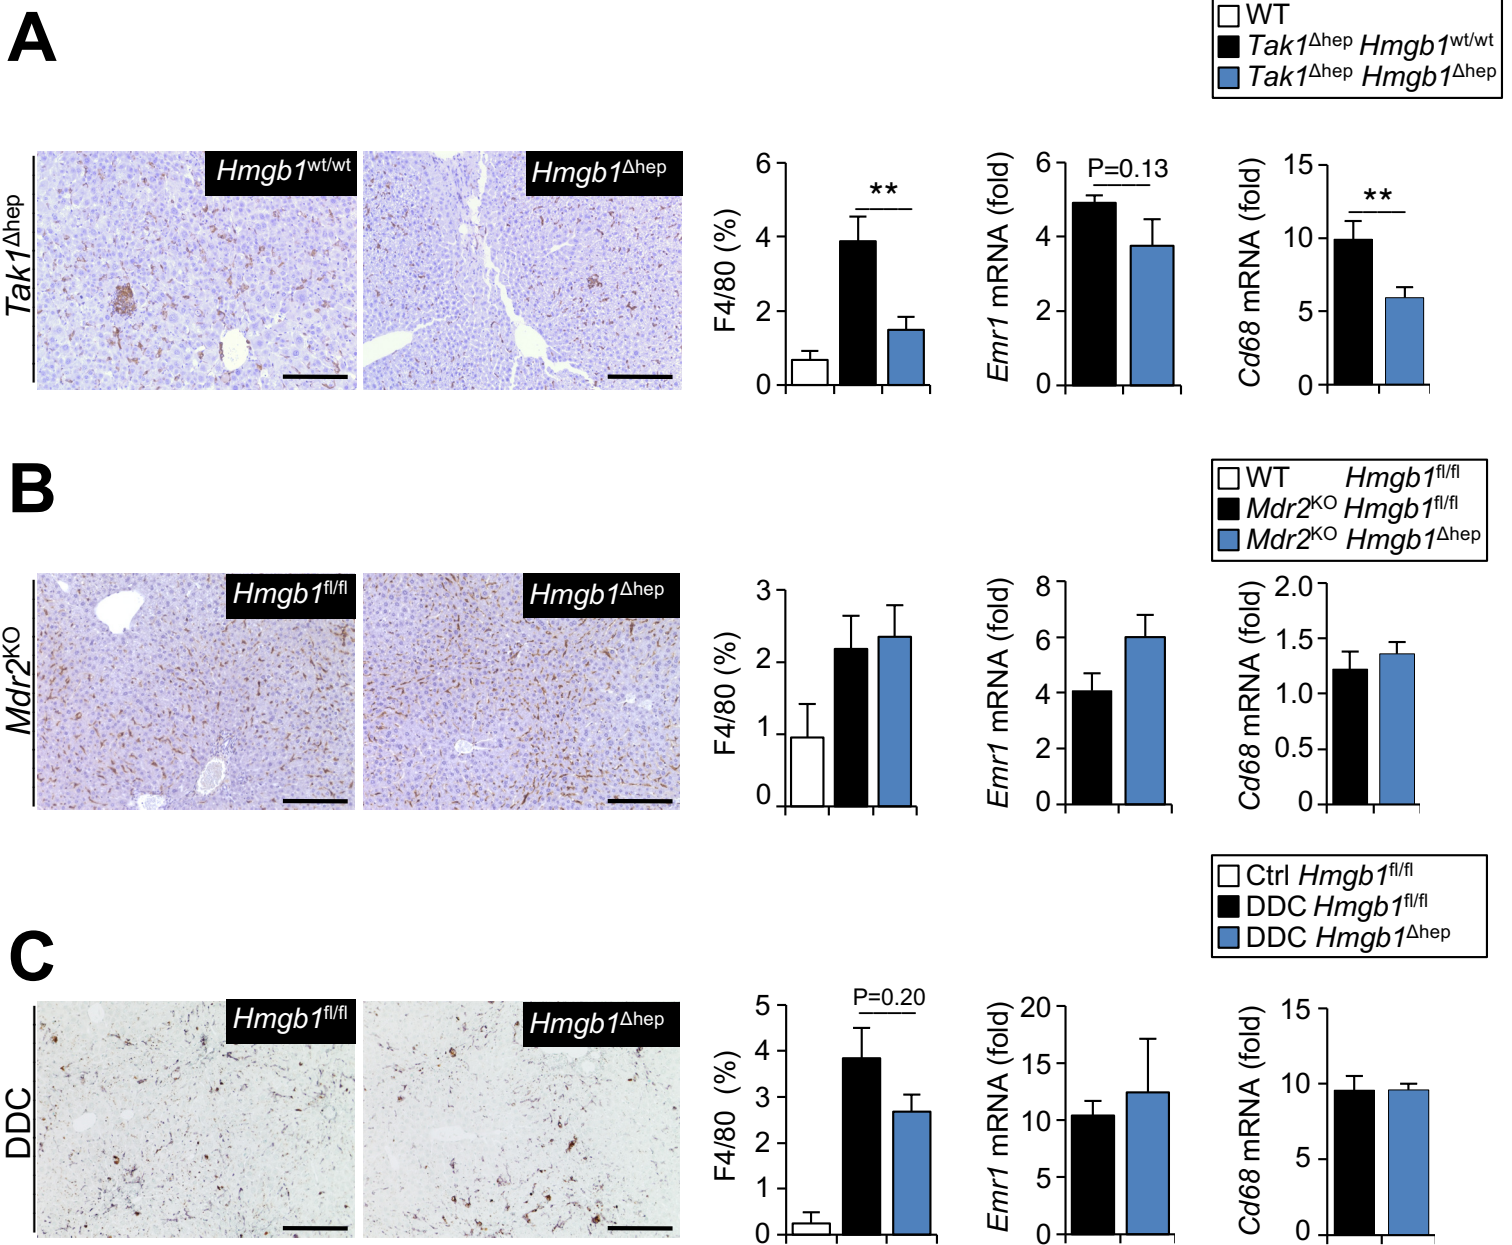

**Supplementary Figure 2. Effect of HMGB1 on macrophage recruitment in chronic liver injury. A.** Macrophage infiltration was determined by F4/80 immunohistochemistry as well as *Emr1* (encoding F4/80) and *Cd68* mRNA in wild-type (n=3), *Tak1*<sup>Δhep</sup> *Hmgb1*<sup>wt/wt</sup> (n=9) and in *Tak1*<sup>Δhep</sup> *Hmgb1*<sup>Δhep</sup> (n=9) mice. **B.** Macrophage infiltration was determined by F4/80 immunohistochemistry as well as *Emr1* and *Cd68* mRNA in wt *Hmgb1*<sup>fl/fl</sup> (n=4), *Mdr2*<sup>KO</sup> *Hmgb1*<sup>fl/fl</sup> (n=10) and in *Mdr2*<sup>KO</sup> *Hmgb1*<sup>Δhep</sup> (n=13) mice. **C.** Macrophage infiltration was determined by F4/80 immunohistochemistry as well as *Emr1* and *Cd68* mRNA in untreated *Hmgb1*<sup>fl/fl</sup> (n=3) as well as *Hmgb1*<sup>fl/fl</sup> (n=6) and in *Hmgb1*<sup>Δhep</sup> (n=9) mice treated with DDC diet. Data are expressed as means ± SEM. qPCR data are expressed as fold induction compared to normal liver. Statistical significance was determined by two-tailed t-test. \*\* p<0.01. Scale bar 100 μm.

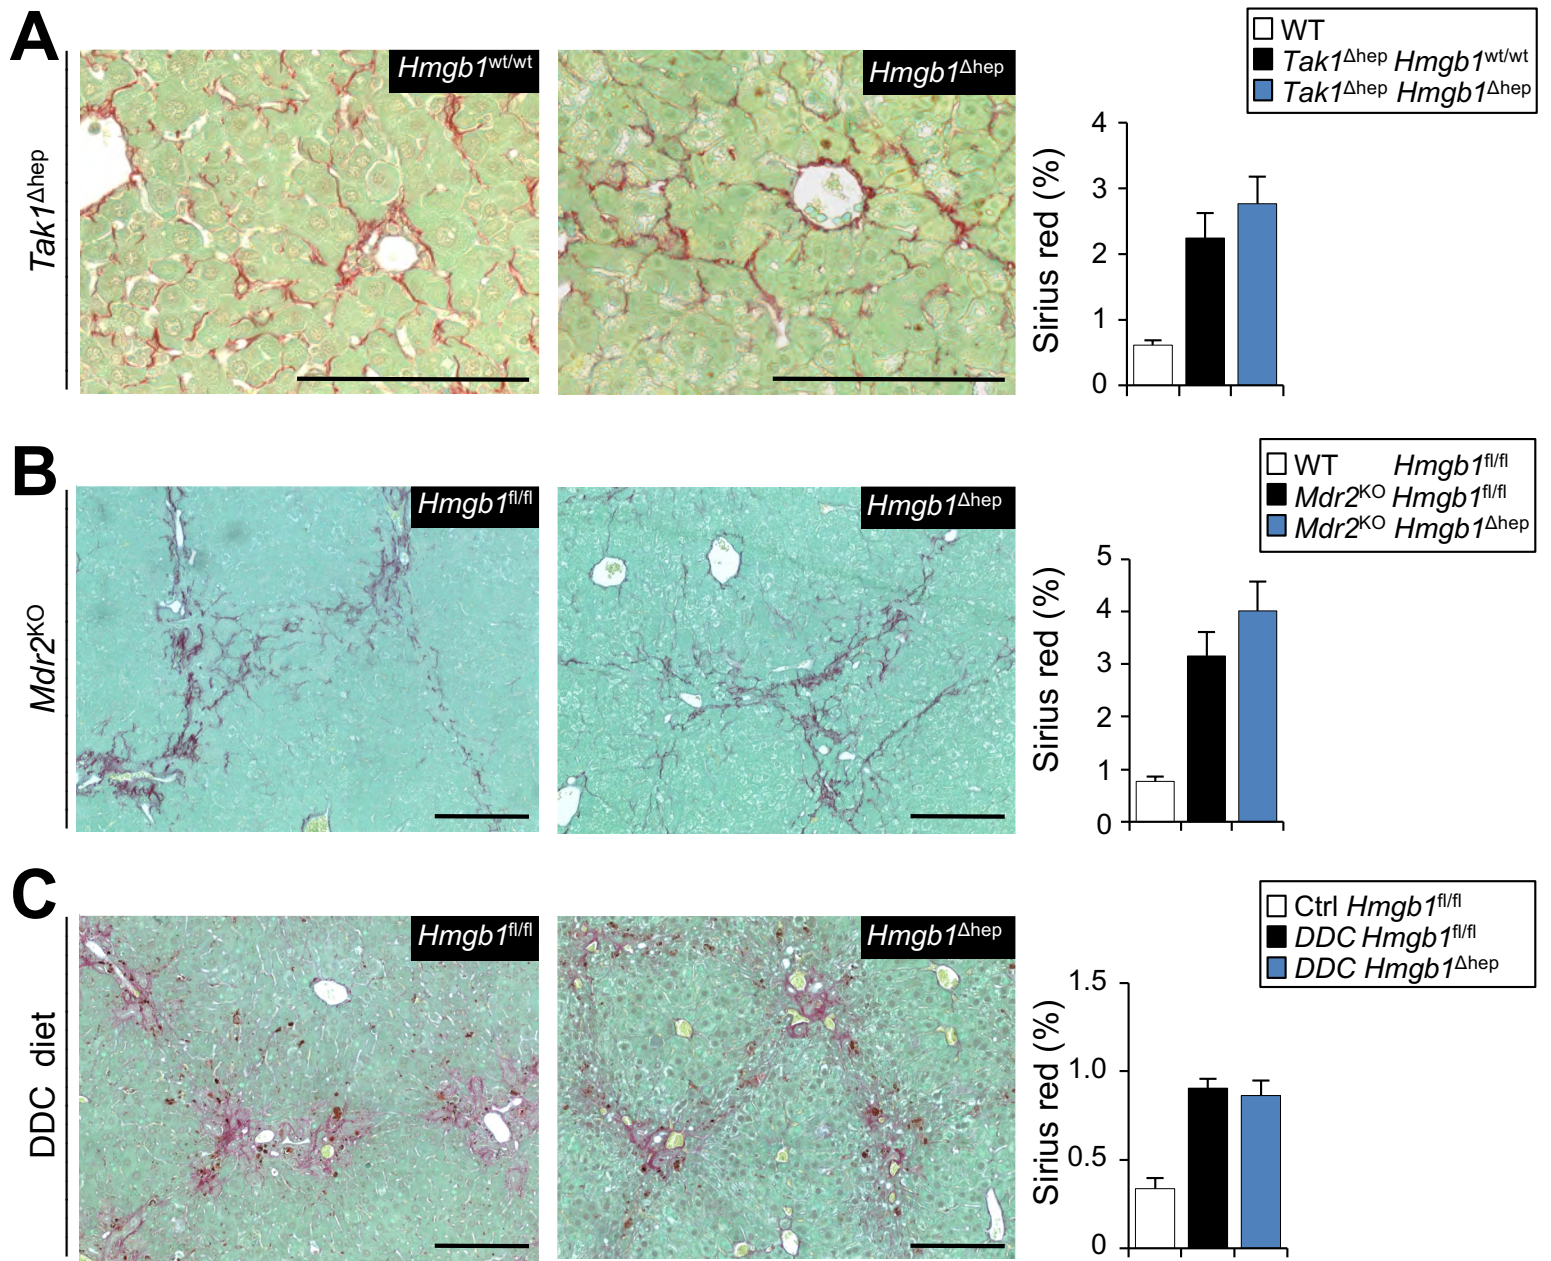

**Supplementary Figure 3. Effect of HMGB1 deletion on liver fibrosis. A-C.** Liver fibrosis, determined by Sirius red staining, was quantified in *Hmgb1<sup>fl/fl</sup>* and *Hmgb1<sup>Δhep</sup>* mice in the *Tak1<sup>Δhep</sup>* (A, n=9 and n=9 mice), *Mdr2<sup>KO</sup>* (B, n=10 and n=13 mice) and DDC models (C, n=6 and n=9 mice). Data are expressed as means ± SEM. Statistical significance was determined by two-tailed t-test. Scale bar 100 μm.

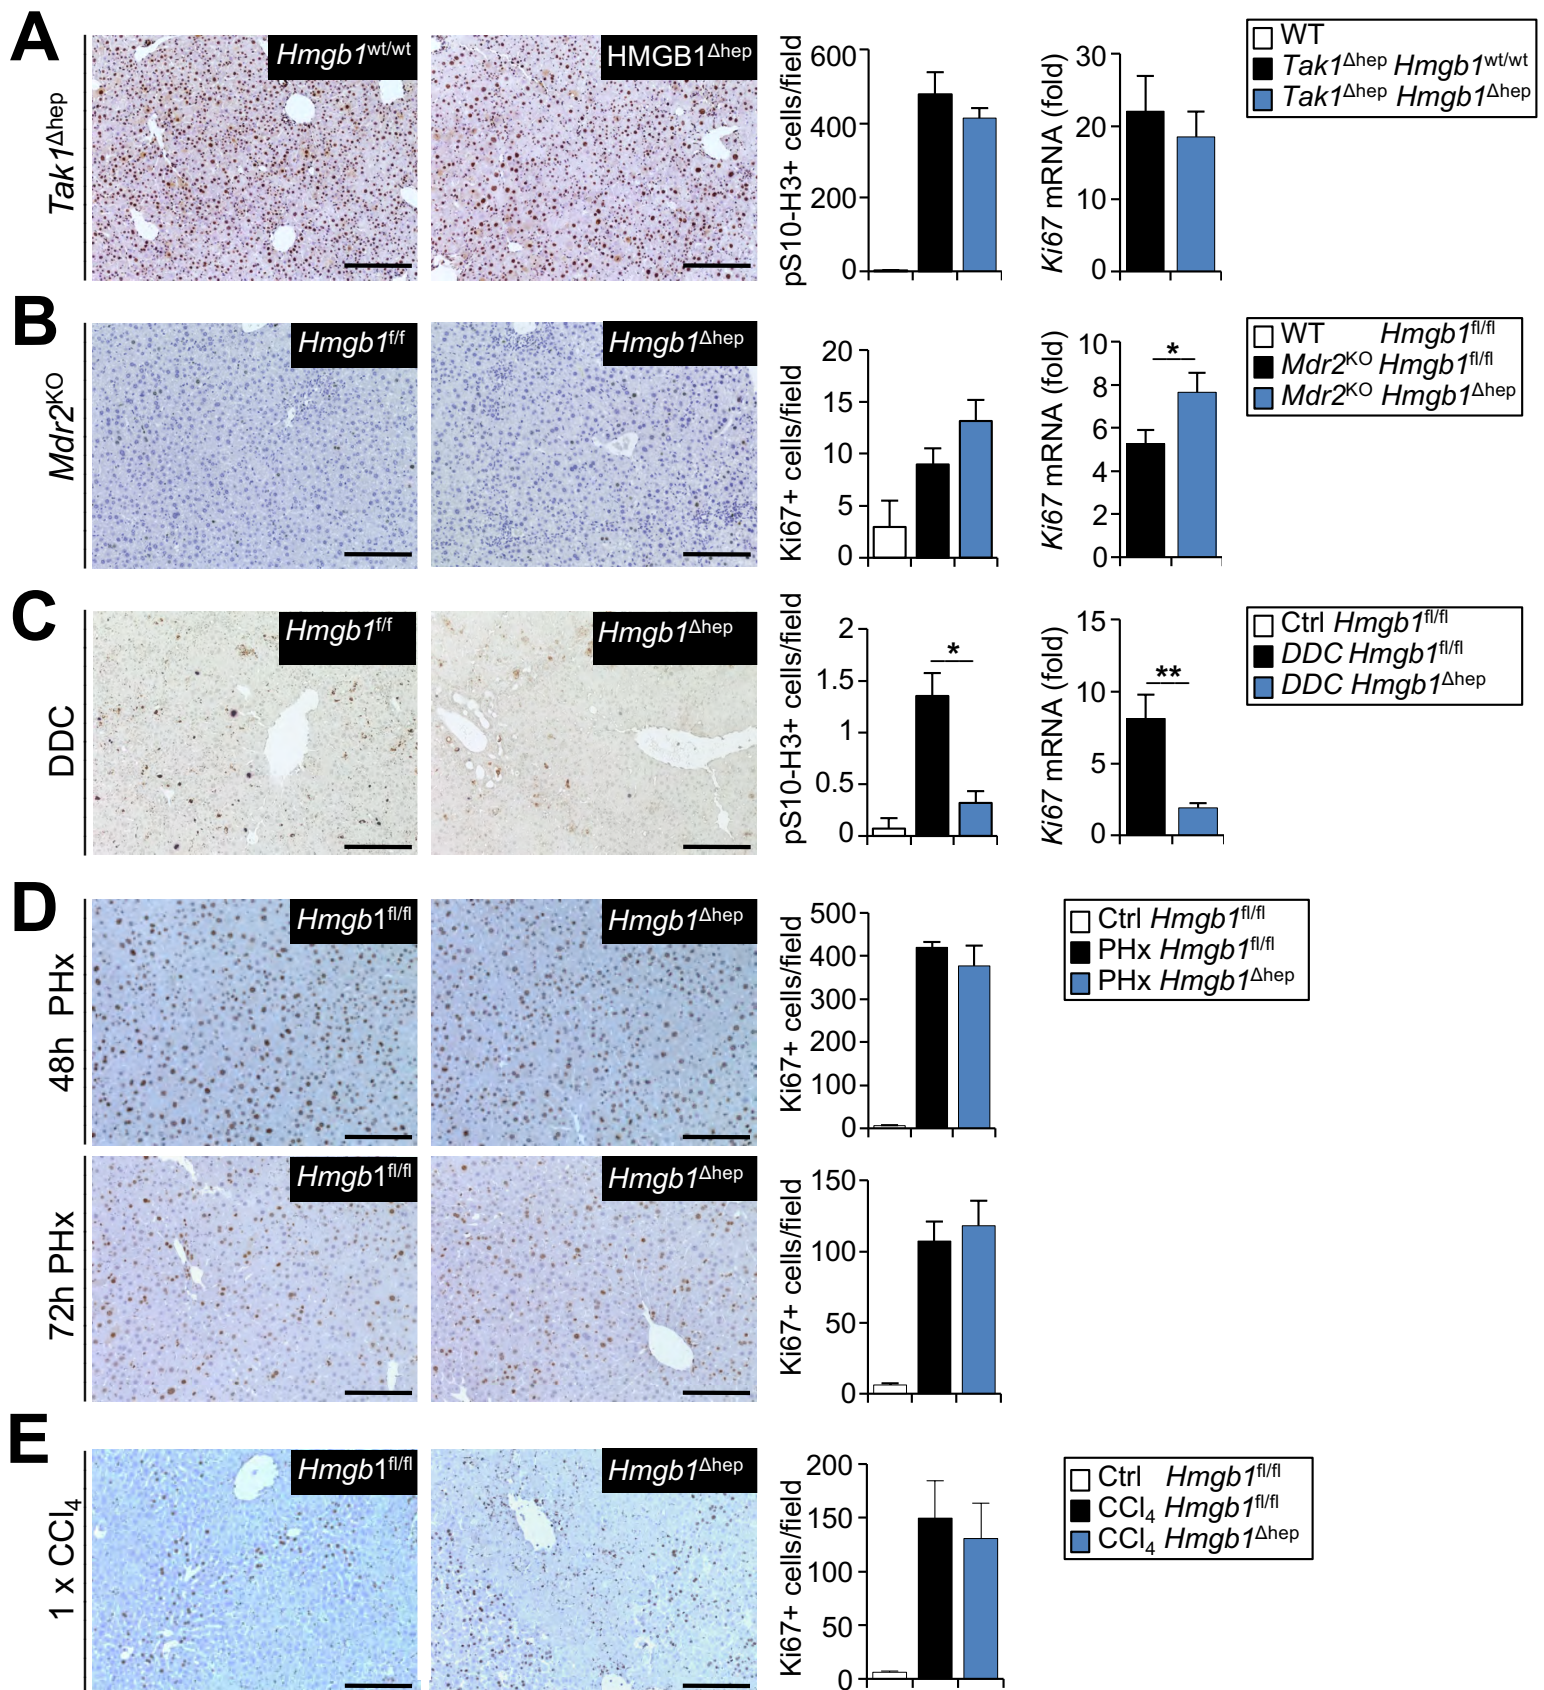

**Supplementary Figure 4. Effect of HMGB1 deletion on hepatocyte proliferation. A - C.** Proliferation, determined by Ki-67 or pS10-H3 immunohistochemistry and qPCR was quantified *Hmgb1*<sup>wt/wt</sup> and *Hmgb1*<sup>Δhep</sup> mice in the *Tak1*<sup>Δhep</sup> (A, n=9 and n=9 mice, respectively), in *Hmgb1*<sup>fl/fl</sup> and *Hmgb1*<sup>Δhep</sup> in the *Mdr2*<sup>KO</sup> model (B, n=10 and n=13 mice, respectively) and the DDC diet model (n=6 and n=9 mice, respectively). **D.** Hepatocyte proliferation, determined by Ki-67 immunohistochemistry, was quantified in *Hmgb1*<sup>fl/fl</sup> (n=5) and *Hmgb1*<sup>Δhep</sup> (n=8) mice subjected to two-thirds partial hepatectomy at the indicated time points. **E.** Hepatocyte proliferation, determined by Ki-67 immunohistochemistry, was quantified in *Hmgb1*<sup>fl/fl</sup> (n=7) and *Hmgb1*<sup>Δhep</sup> (n=6) mice 48 hours after a single injection of CCl<sub>4</sub> (0.5 ul/g, dissolved in corn oil, i.p.). Data are expressed as means ± SEM. qPCR data are expressed as fold induction compared to normal liver. Statistical significance was determined by two-tailed t-test. \* p<0.05; \*\* p<0.01. Scale bar 100 μm.

**A**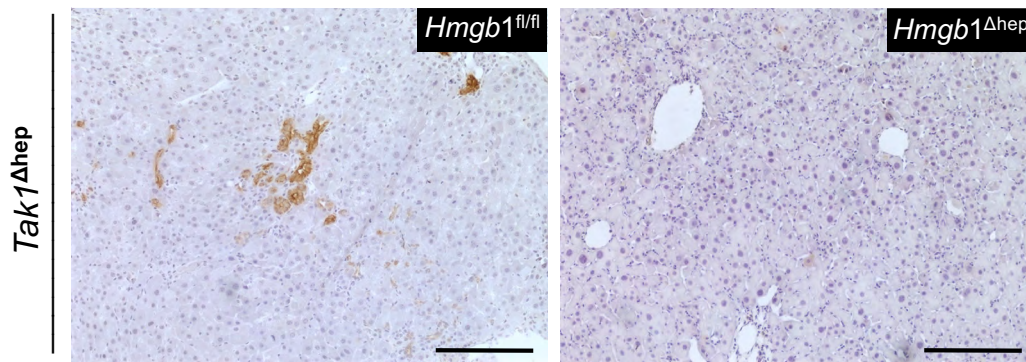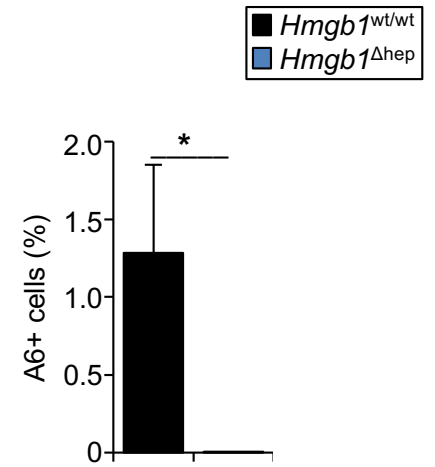**B**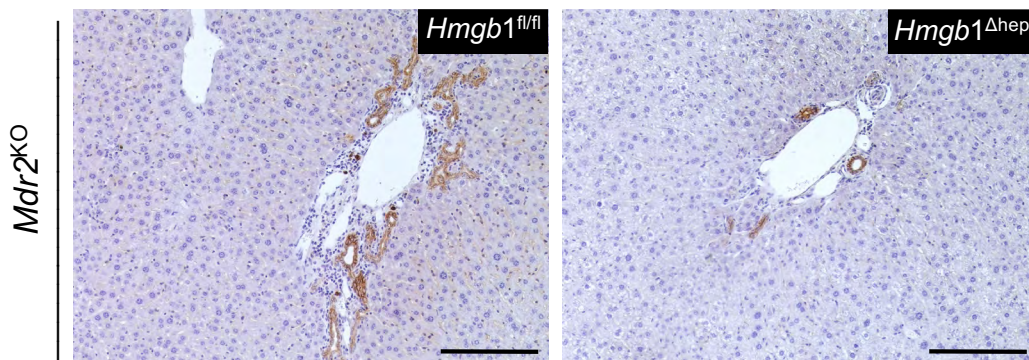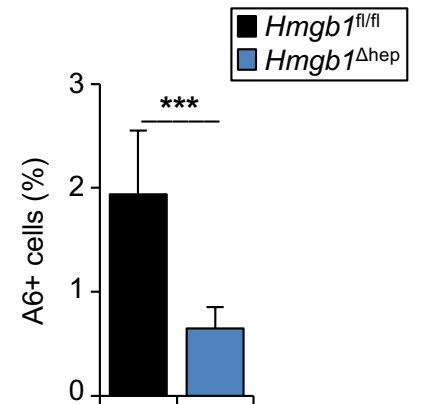

**Supplementary Figure 5. Expression of A6 in *Hmgb1*<sup>Δhep</sup> mice. A-B.** A6-positive cells were detected by immunohistochemistry in *Hmgb1*<sup>fl/fl</sup> and *Hmgb1*<sup>Δhep</sup> mice in the TAK1<sup>Δhep</sup> (A, n=5 and n=5, respectively) and *Mdr2*<sup>KO</sup> (B, n=10 and n=13, respectively). Data are expressed as means ± SEM. Statistical significance was determined by two-tailed t-test. \*p<0.05; \*\*\*p<0.001. Scale bar 100 μm.

**A**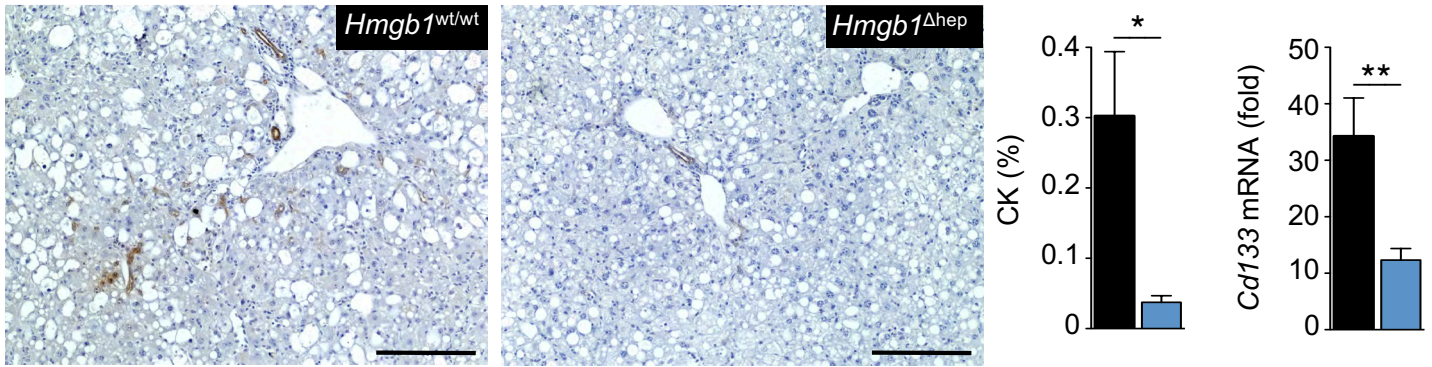

**Supplementary Figure 6. HMGB1 is required for ductular reactions.** Following three weeks of MCDE diet, *Hmgb1*<sup>Δhep</sup> mice (n=7) showed reduction of cytokeratin-positive ductular cells (D), and lower expression of *Cd133* mRNA in comparison to *Hmgb1*<sup>fl/fl</sup> controls (n=7). All data are expressed as means ± SEM. qPCR data are shown as fold induction compared to normal liver. Statistical significance was determined by two-tailed t-test. \* p<0.05; \*\* p<0.01. Scale bar 100 μm.

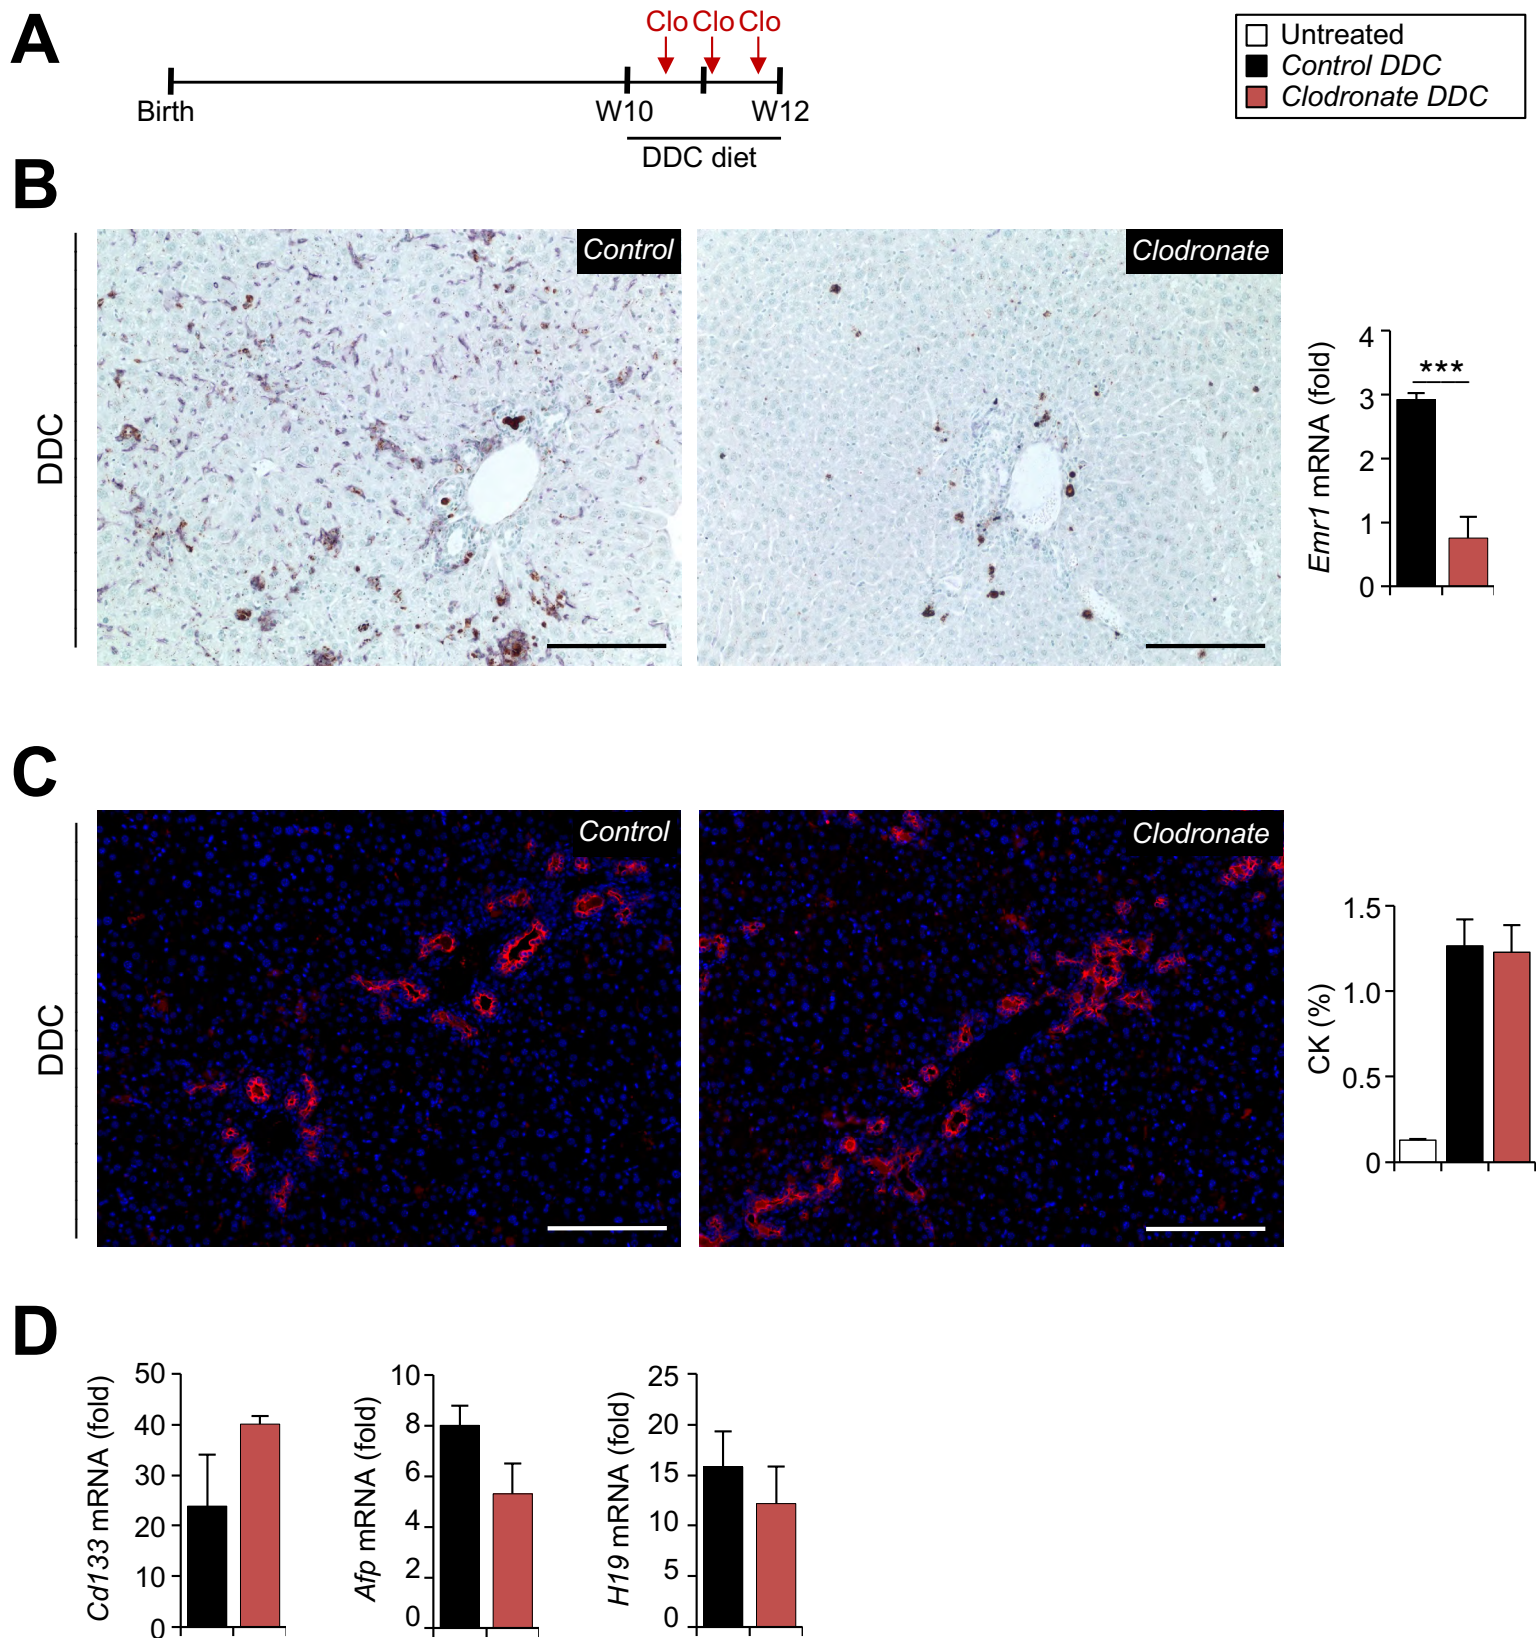

**Supplementary Figure 7. Effect of macrophage ablation on ductular reactions.** **A.** Macrophages were ablated in DDC diet treated mice by intraperitoneal injection of liposomal clodronate (n=7 mice) or control liposomes (n=11 mice) as depicted. **B.** Macrophages were efficiently ablated by liposomal clodronate as demonstrated by F4/80 immunohistochemistry and qPCR for *Emr1* mRNA (encoding F4/80). **C-D.** Macrophage ablation by liposomal clodronate did not affect ductular reactions in DDC diet-treated mice as demonstrated by similar immunohistochemical staining for cytokeratin (C) or qPCR for *Cd133*, *Afp* and *H19* mRNA (D) Data are expressed as means  $\pm$  SEM. qPCR data are expressed as fold induction compared to normal liver. Statistical significance was determined by two-tailed t-test. \*\*\*  $p < 0.001$ . Scale bar 100  $\mu$ m

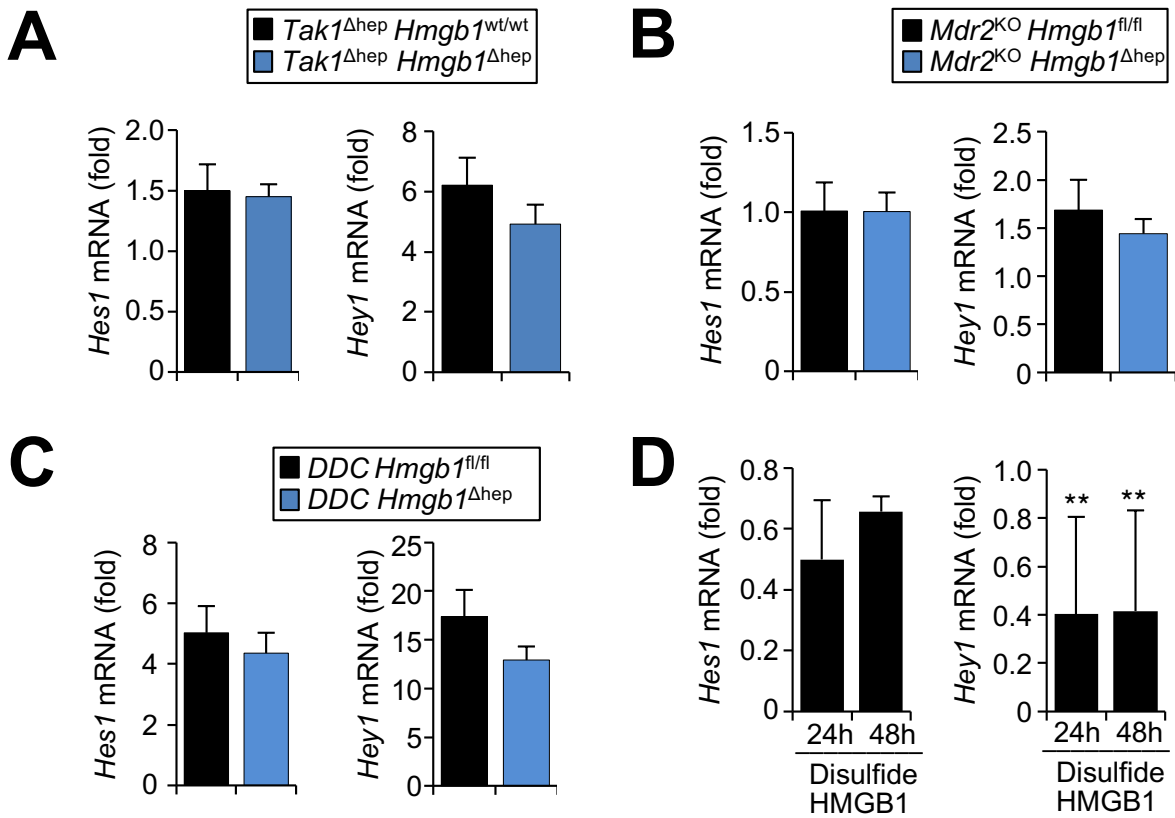

**Supplementary Figure 8. Expression Notch target genes in *Hmgb1*<sup>Δhep</sup> mice and HMGB1-treated BMOL cells.** A-C. Notch target genes *Hes1* and *Hey1* were determined by qPCR in the *TAK1*<sup>Δhep</sup> model (A) in *Hmgb1*<sup>wt/wt</sup> (n=9 mice) and *Hmgb1*<sup>Δhep</sup> (n=9 mice); (B) in the *Mdr2*<sup>KO</sup> model in *Hmgb1*<sup>fl/fl</sup> (n=9) and *Hmgb1*<sup>Δhep</sup> (n=13) mice; and in the DDC diet model (C) in *Hmgb1*<sup>fl/fl</sup> (n=6) and *Hmgb1*<sup>Δhep</sup> (n=9) mice. D. Notch target genes *Hes1* and *Hey1* were determined by qPCR in BMOL cells treated with disulfide HMGB1 (2 μg/ml). Data are expressed as means ± SEM and shown as fold induction in comparison to normal liver (A-C) or untreated BMOL cells (D). Statistical significance was determined by two-tailed t-test (*Hmgb1*<sup>wt/wt</sup> vs. *Hmgb1*<sup>Δhep</sup> in A-C, and 24h- and 48h-treated cells vs untreated cells in D). \*p<0.05; \*\* p<0.01; \*\*\* p<0.001



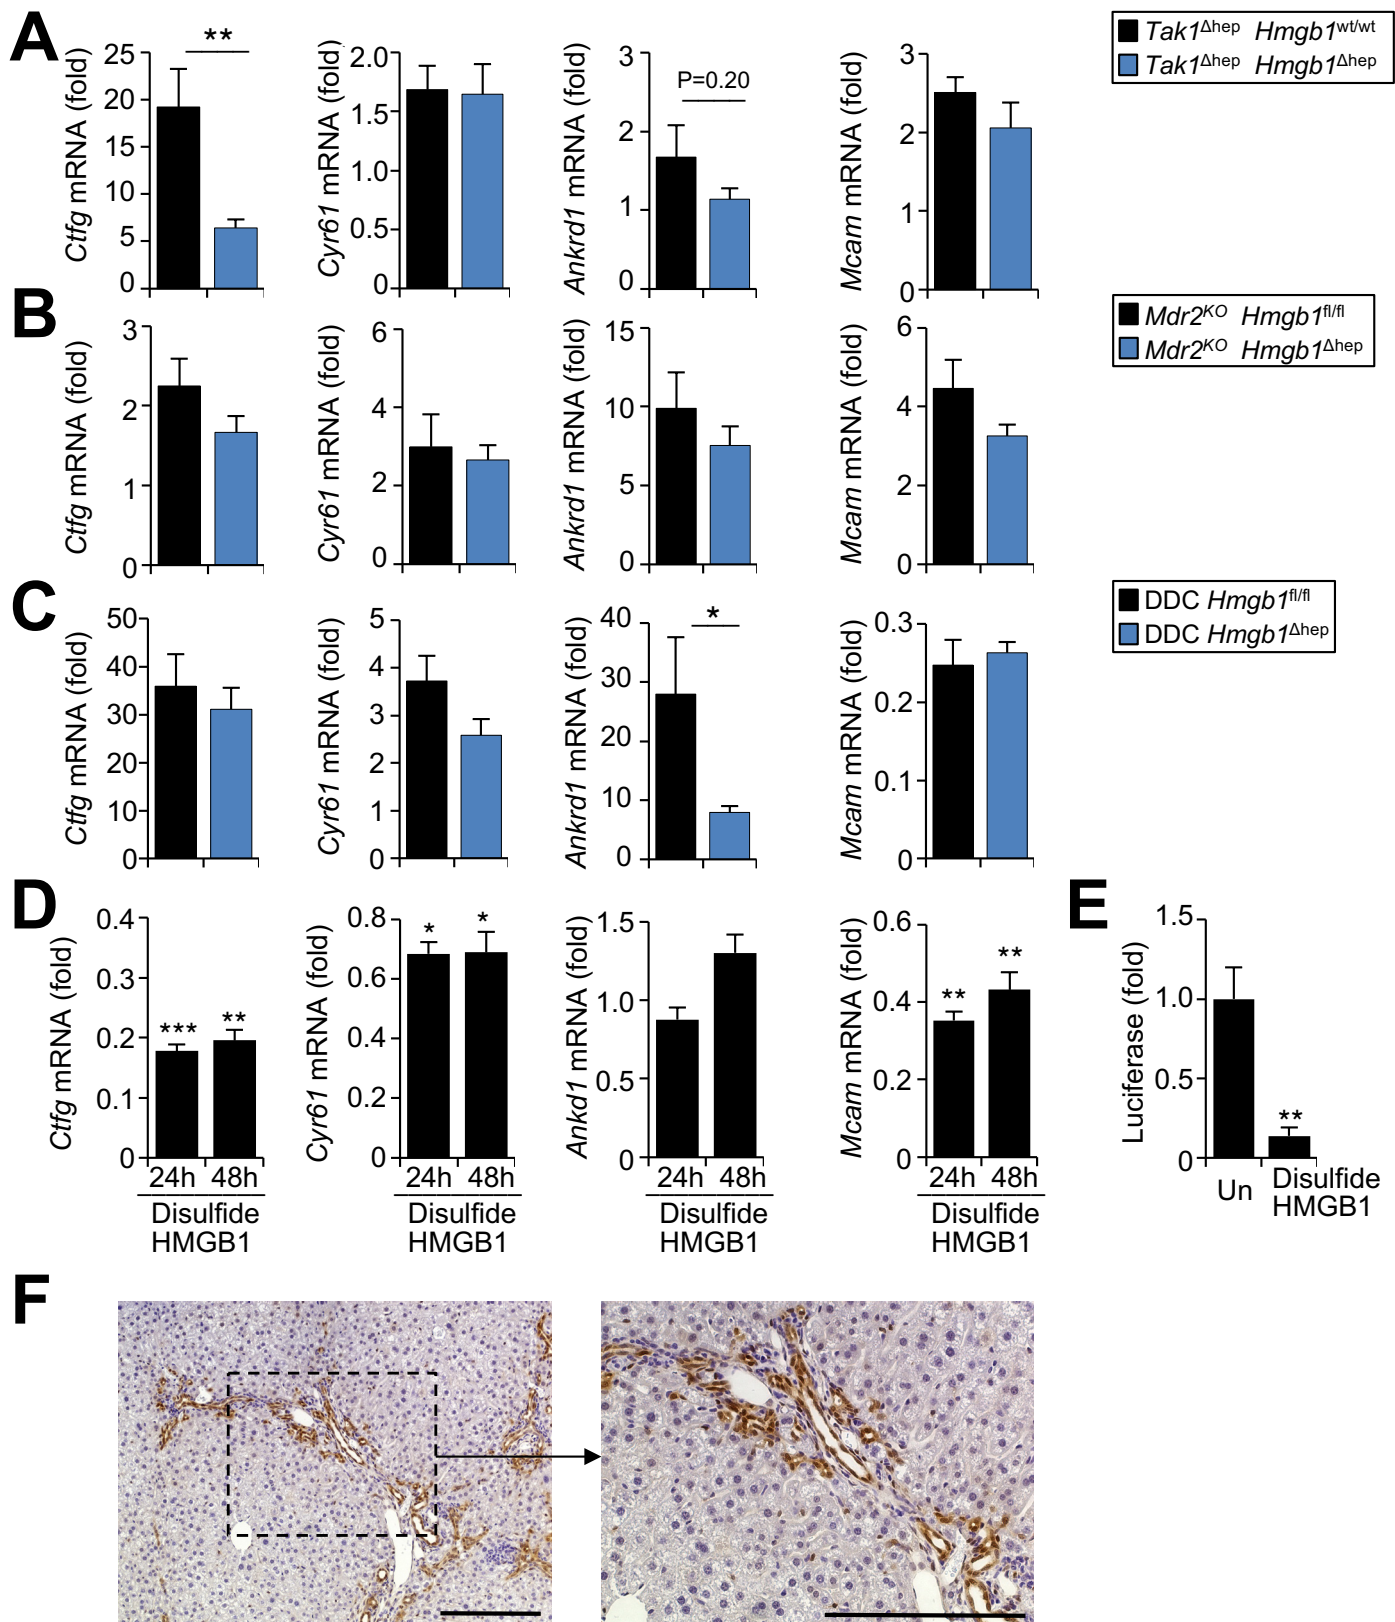

**Supplementary Figure 9. Expression of Yap target genes in *Hmgb1*<sup>Δhep</sup> mice and HMGB1-treated BMOL cells.** **A.** Yap target genes *Ctfg*, *Cyr61*, *Ankrd1* and *Mcam* were determined by qPCR in *Hmgb1*<sup>wt/wt</sup> TAK1<sup>Δhep</sup> mice (n=11 mice) and *Hmgb1*<sup>Δhep</sup> TAK1<sup>Δhep</sup> mice (n=9 mice). **B.** Yap target genes *Ctfg*, *Cyr61*, *Ankrd1* and *Mcam* were determined by qPCR in *Hmgb1*<sup>fl/fl</sup> *Mdr2*<sup>KO</sup> (n=9) and *Hmgb1*<sup>Δhep</sup> *Mdr2*<sup>KO</sup> (n=13) mice. **C.** Yap target genes *Ctfg*, *Cyr61*, *Ankrd1*, and *Mcam* were determined by qPCR in *Hmgb1*<sup>fl/fl</sup> (n=6) and *Hmgb1*<sup>Δhep</sup> (n=9) mice treated with DDC diet. **D.** Yap target genes *Ctfg*, *Cyr61*, *Ankrd1*, and *Mcam* were determined by qPCR in BMOL cells treated with disulfide HMGB1 (2 μg/ml). **E.** Yap luciferase reporter was performed in BMOL cells treated with disulfide HMGB1 for 48 hours. **F.** YAP was determined by immunohistochemistry. Data are expressed as means ± SEM and shown as fold induction in comparison to normal liver (A-C) or untreated BMOL cells (D,E). Statistical significance was determined by two-tailed t-test (*Hmgb1*<sup>wt/wt</sup> vs. *Hmgb1*<sup>Δhep</sup> in A-C, and 24h- and 48h-treated cells vs untreated cells in D,E). \*p<0.05; \*\*p<0.01; \*\*\*p<0.001. Scale bar 100 μm.

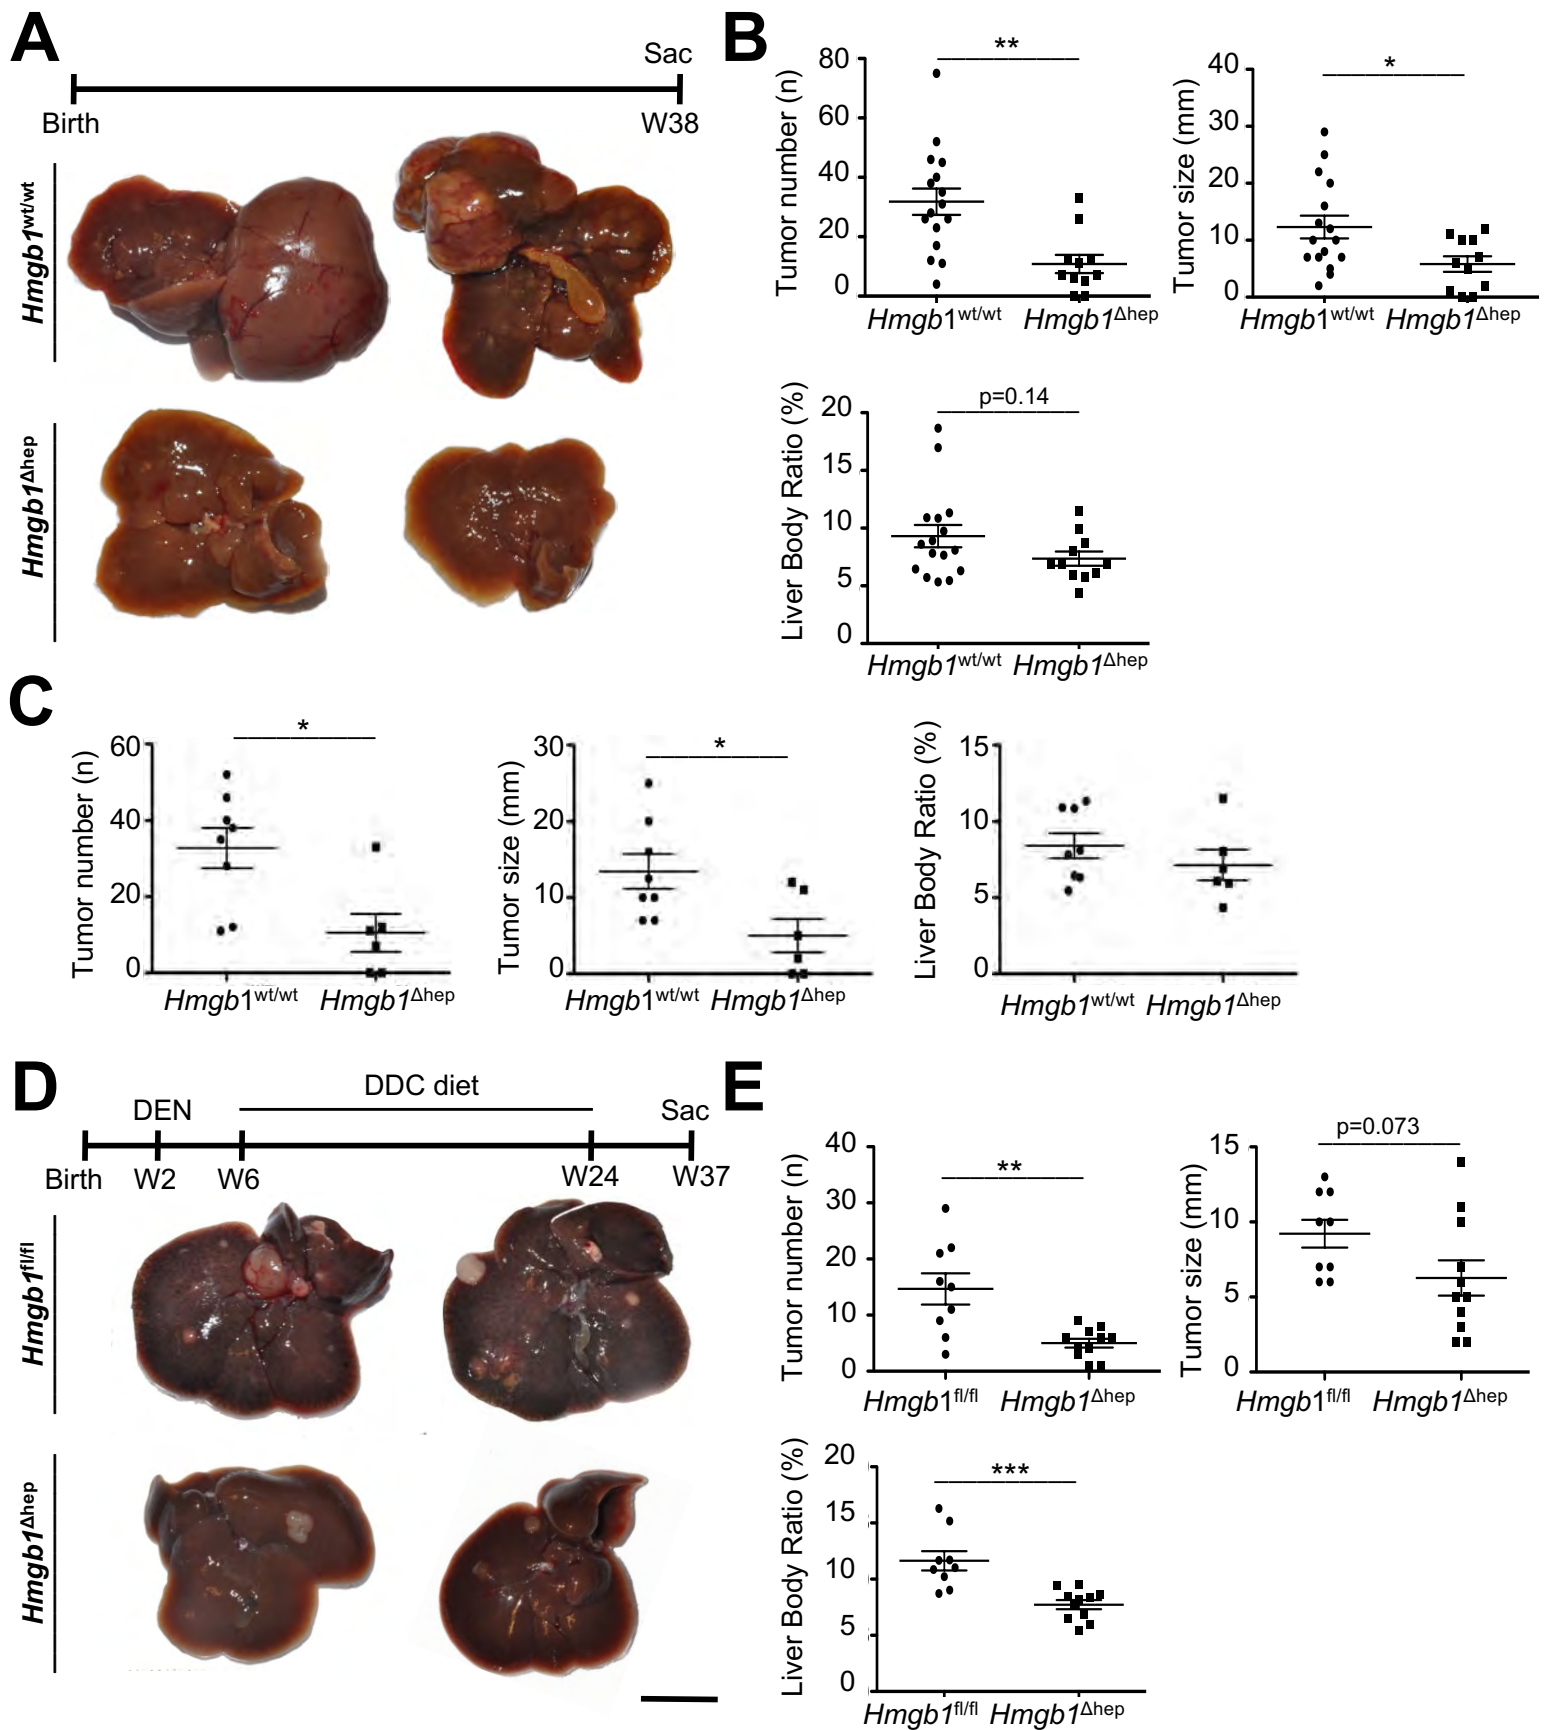

**Supplementary Figure 10. HMGB1 promotes hepatocarcinogenesis in models with chronic liver injury.** **A- C.** *Tak1*<sup>Δhep</sup> that were either *Hmgb1* wild-type (*Hmgb1*<sup>wt/wt</sup>, n=16) or expressed floxed *Hmgb1* alleles (*Hmgb1*<sup>Δhep</sup>, n=11) were sacrificed at the indicated times (A). Livers were photographed (A) and tumor number, size and liver body weight ratio were determined (B). The same analysis was performed using only mice of male gender in both groups (C). **D- E.** Male *Hmgb1*<sup>fl/fl</sup> (n=9) and *Hmgb1*<sup>Δhep</sup> (n=11) mice were treated with DEN followed by treatment with DDC diet and sacrificed as indicated (D). Livers were photographed (D) and tumor number, size and liver body weight ratio were determined (E). Data are expressed as means ± SEM. Statistical significance was determined by two-tailed t-test. \* p<0.05; \*\* p<0.01; \*\*\* p<0.001. Scale bar 1cm.

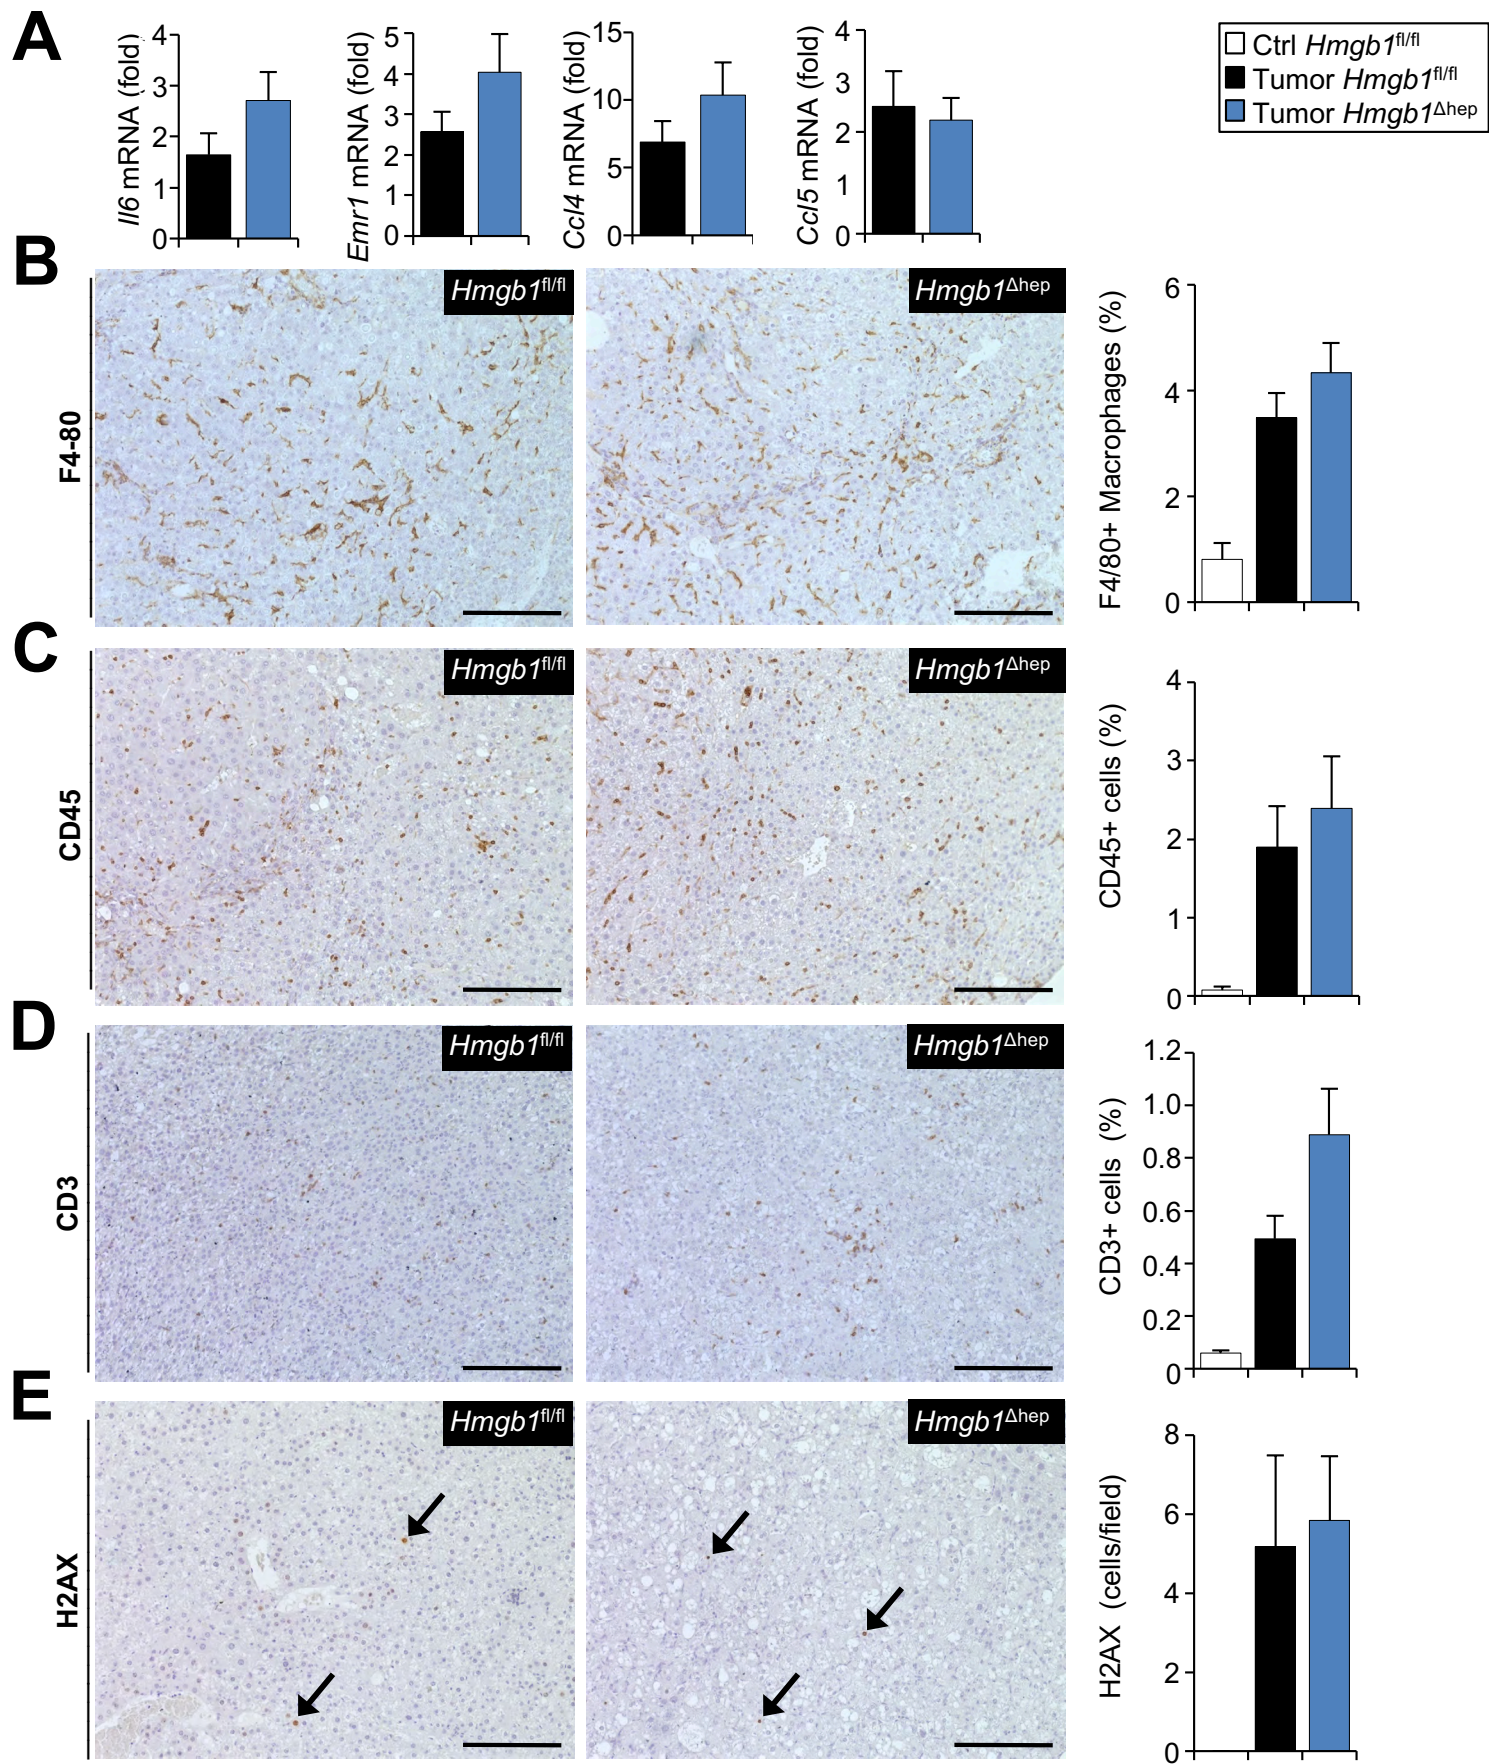

**Supplementary Figure 11. HMGB1 does not promote inflammation, inflammatory cell infiltration or genotoxic stress during hepatocarcinogenesis. A- E.** Tumors from DEN+15xCCl<sub>4</sub>-treated *Hmgb1*<sup>fl/fl</sup> (n=12) and *Hmgb1*<sup>Δhep</sup> (n=12) mice were analyzed by immunohistochemistry and qPCR to determine expression of inflammatory genes *Il6*, *Emr1*, *Ccl4* and *Ccl5* (A), infiltration of F4/80- positive macrophages (B), infiltration of CD45-positive leukocytes (C), infiltration of CD3- positive T cells (D) and expression of genotoxic stress marker H2AX (E, arrows pointing towards positive cells). Data are expressed as means ± SEM. qPCR data is expressed as fold induction compared to normal liver. Statistical significance was determined by two-tailed t-test. Scale bar 100 μm.

**A**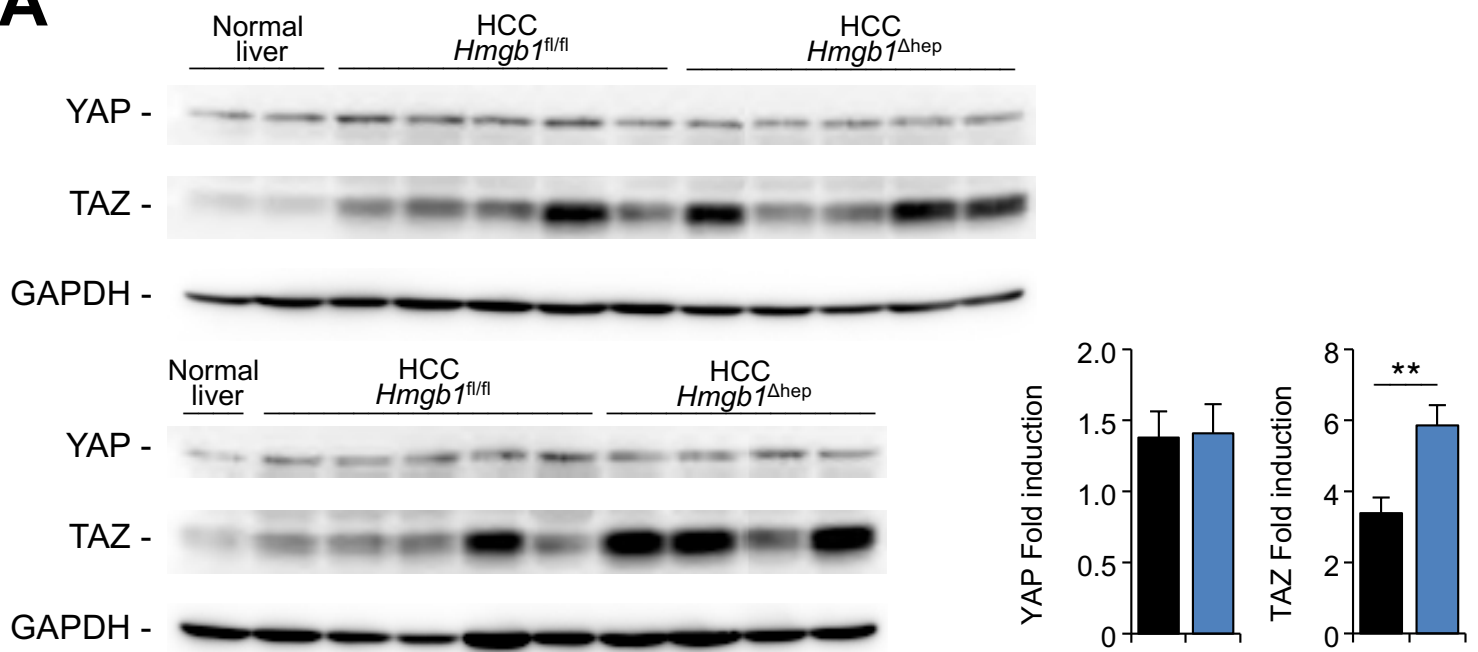**B**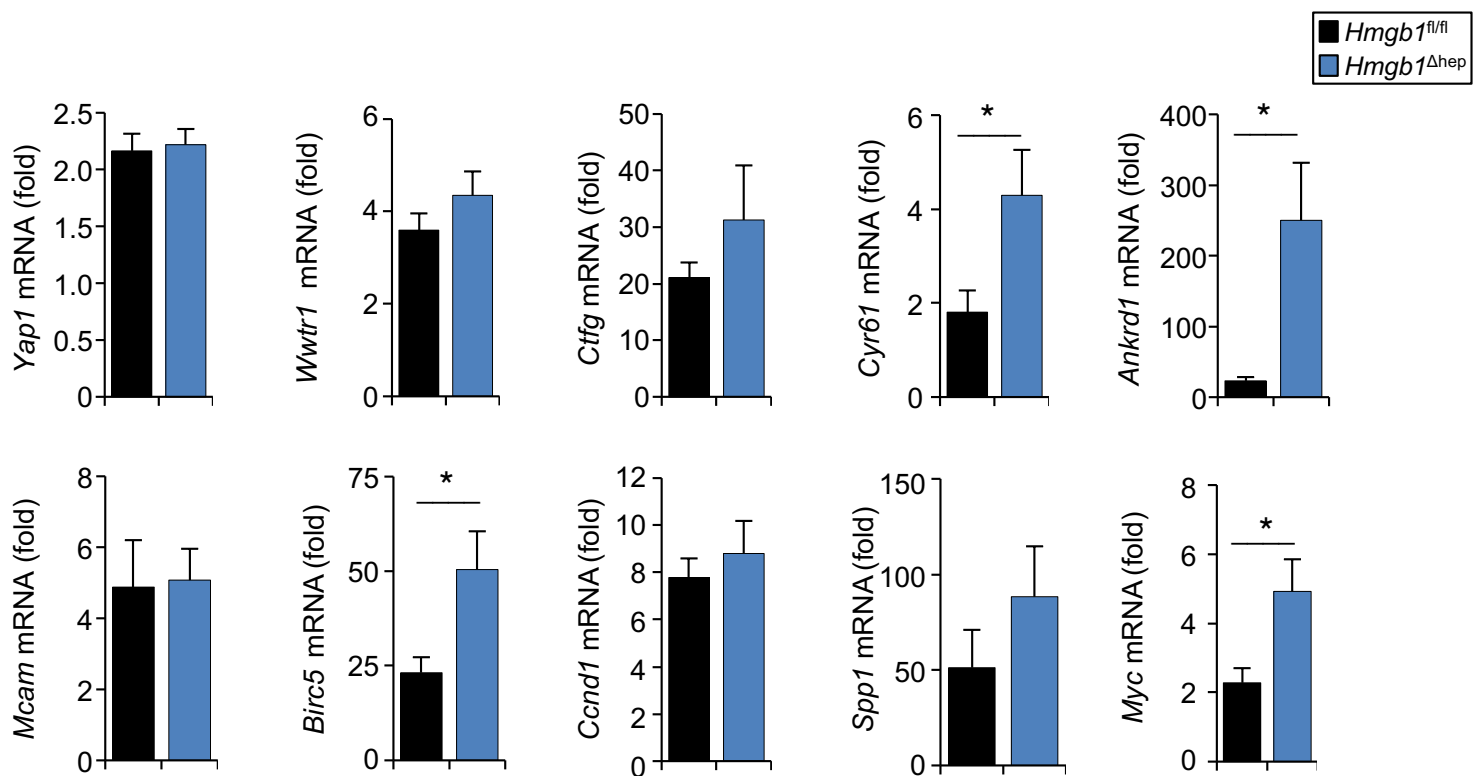

**Supplementary Figure 12. Expression of Yap and YAP target genes in *Hmgb1<sup>Δhep</sup>* mice and HMGB1-treated HCC. A.** Expression of TAZ and YAP was determined by western blot and quantified in normal liver (n=3) and DEN+CCl<sub>4</sub>-induced HCC from HCC *Hmgb1<sup>fl/fl</sup>* mice (n=10) or HCC from HCC from *Hmgb1<sup>Δhep</sup>* mice (n=9). TAZ and YAP levels are expressed in comparison to normal liver **B.** Expression of *Yap1*, *Wwtr1* (encoding TAZ), YAP target genes *Ctfg*, *Cyr61*, *Ankrd1*, *Mcam*, *Birc5*, *Ccnd1*, *Spp1* and *Myc* was determined in normal liver (n=3) and DEN+CCl<sub>4</sub>-induced HCC from HCC *Hmgb1<sup>fl/fl</sup>* mice (n=12) or HCC from HCC from *Hmgb1<sup>Δhep</sup>* mice (n=12). Statistical significance was determined by two-tailed t-test. \* p<0.05 \*\* p<0.01.

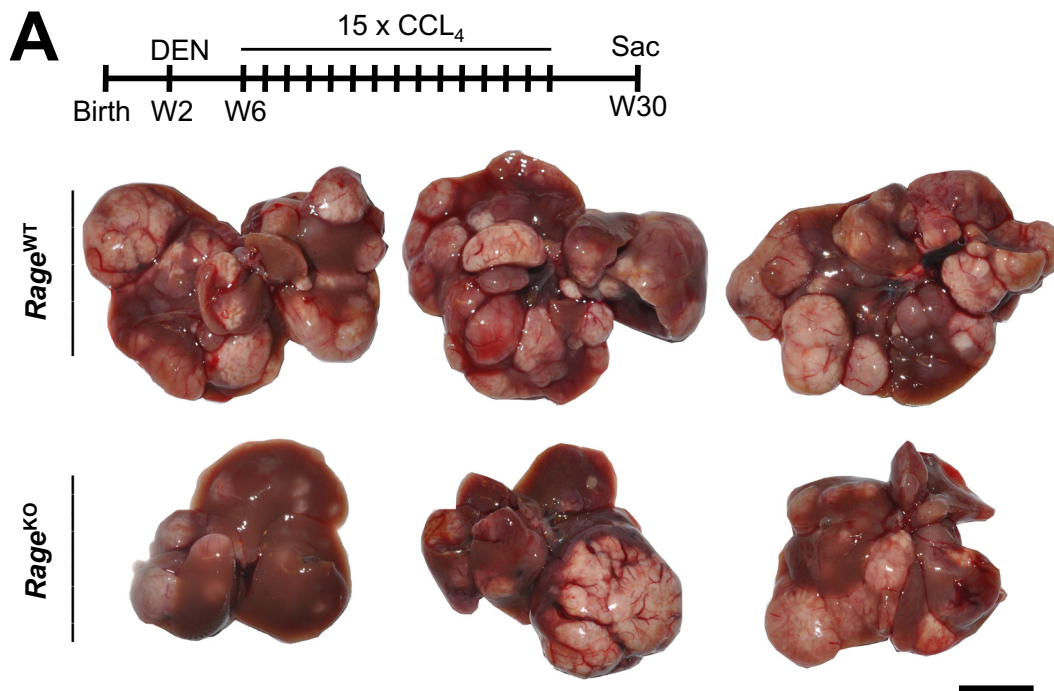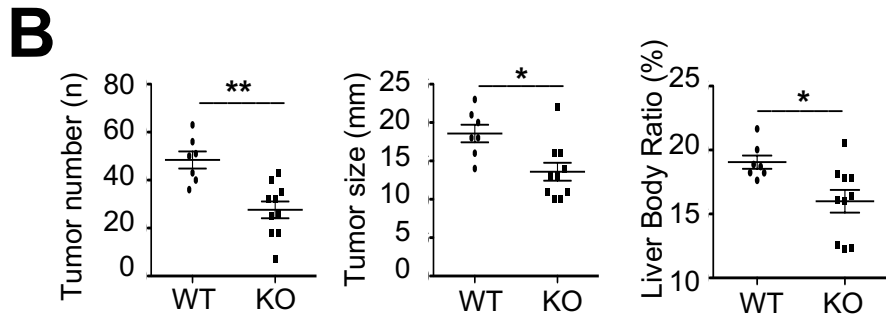

**Supplementary Figure 13. RAGE promotes hepatocarcinogenesis. A-B.** Male wild-type (WT, n=7) and RAGE-deficient (*Rage*<sup>KO</sup>, n=10) mice were treated with DEN plus 15 injections of CCl<sub>4</sub> as indicated. (A). Livers were photographed (A) and tumor number, size and liver body weight ratio were determined (B). Data are expressed as means ± SEM. Statistical significance was determined by two-tailed t-test. \* p<0.05; \*\* p<0.01. Scale bar 1cm.

**Supplementary Table 1. Gene expression changes between HCC HMGB1<sup>Δhep</sup> (n=6) and HCC HMGB1<sup>fl/fl</sup> (n=6) and between HCC HMGB1<sup>fl/fl</sup> (n=6) and normal liver (n=3).** Shown are genes, determined by RNA sequencing, with (fdr) ≤ 0.05, an absolute log<sub>2</sub> fold (log<sub>2</sub>FC) change ≥ 0.6 and restriction to the twelve most significant pathways, as determined by iPathwayGuide, plus progenitor and oncofetal genes *Afp*, *H19* and *Prom1*.

| <b>GENE<br/>SYMBOL</b> | <b>log2FC<br/>(HCC HMGB1<sup>Δhep</sup><br/>vs<br/>HCC HMGB1<sup>fl/fl</sup>)</b> | <b>FDR<br/>(HCC HMGB1<sup>Δhep</sup><br/>vs<br/>HCC HMGB1<sup>fl/fl</sup>)</b> | <b>log2FC<br/>(HCC HMGB1<sup>fl/fl</sup><br/>vs.<br/>normal liver)</b> | <b>FDR<br/>(HCC HMGB1<sup>fl/fl</sup><br/>vs.<br/>normal liver)</b> |
|------------------------|-----------------------------------------------------------------------------------|--------------------------------------------------------------------------------|------------------------------------------------------------------------|---------------------------------------------------------------------|
| <i>A4galt</i>          | 0.61                                                                              | NA                                                                             | 2.18                                                                   | 2.78E-03                                                            |
| <i>Aadat</i>           | 2.10                                                                              | 3.97E-14                                                                       | -3.05                                                                  | 2.72E-32                                                            |
| <i>Aass</i>            | 0.65                                                                              | 2.29E-01                                                                       | -2.15                                                                  | 9.88E-17                                                            |
| <i>Abat</i>            | 1.15                                                                              | 1.03E-02                                                                       | -3.05                                                                  | 1.22E-22                                                            |
| <i>Acaa1a</i>          | 0.74                                                                              | 2.57E-02                                                                       | -1.25                                                                  | 1.66E-06                                                            |
| <i>Acaa1b</i>          | 2.10                                                                              | 5.58E-07                                                                       | -2.74                                                                  | 3.19E-30                                                            |
| <i>Acaa2</i>           | 0.47                                                                              | 1.73E-01                                                                       | -1.19                                                                  | 3.66E-12                                                            |
| <i>Acacb</i>           | 0.78                                                                              | 1.34E-01                                                                       | -1.66                                                                  | 2.19E-10                                                            |
| <i>Acad8</i>           | 0.67                                                                              | 3.83E-04                                                                       | -1.32                                                                  | 1.56E-14                                                            |
| <i>Acadl</i>           | 0.36                                                                              | 1.41E-01                                                                       | -0.85                                                                  | 2.13E-06                                                            |
| <i>Acadm</i>           | 0.71                                                                              | 5.49E-05                                                                       | -1.12                                                                  | 2.49E-07                                                            |
| <i>Acads</i>           | 0.61                                                                              | 1.61E-02                                                                       | -1.15                                                                  | 2.37E-07                                                            |
| <i>Acadsb</i>          | 0.93                                                                              | 1.61E-03                                                                       | -2.06                                                                  | 2.54E-30                                                            |
| <i>Acadvl</i>          | 0.60                                                                              | 5.90E-03                                                                       | -1.57                                                                  | 1.72E-22                                                            |
| <i>Acat1</i>           | 0.83                                                                              | 3.71E-06                                                                       | -1.58                                                                  | 1.26E-15                                                            |
| <i>Acer2</i>           | -0.97                                                                             | 1.03E-02                                                                       | 1.79                                                                   | 1.71E-09                                                            |
| <i>Acmsd</i>           | -1.07                                                                             | 3.11E-02                                                                       | 0.66                                                                   | 2.66E-02                                                            |
| <i>Aco1</i>            | 0.71                                                                              | 1.30E-03                                                                       | -1.49                                                                  | 1.18E-14                                                            |
| <i>Acot1</i>           | 2.13                                                                              | 3.69E-05                                                                       | -3.28                                                                  | 2.03E-12                                                            |
| <i>Acot2</i>           | 1.18                                                                              | 2.32E-05                                                                       | -0.11                                                                  | 7.28E-01                                                            |
| <i>Acot3</i>           | 2.86                                                                              | 7.53E-07                                                                       | -2.07                                                                  | 3.43E-04                                                            |
| <i>Acot4</i>           | 0.82                                                                              | 7.68E-02                                                                       | -1.13                                                                  | 3.47E-04                                                            |
| <i>Acot8</i>           | 0.17                                                                              | 6.69E-01                                                                       | -0.69                                                                  | 8.66E-05                                                            |
| <i>Acox1</i>           | 1.22                                                                              | 1.02E-02                                                                       | -2.19                                                                  | 2.58E-21                                                            |
| <i>Acox3</i>           | 0.57                                                                              | 1.79E-02                                                                       | -1.13                                                                  | 4.33E-10                                                            |
| <i>Acs11</i>           | 0.95                                                                              | 2.81E-02                                                                       | -2.77                                                                  | 8.18E-35                                                            |
| <i>Acs14</i>           | -0.75                                                                             | 3.09E-02                                                                       | 0.96                                                                   | 3.05E-05                                                            |
| <i>Acs16</i>           | 0.54                                                                              | NA                                                                             | -2.53                                                                  | 2.04E-03                                                            |
| <i>Acsm1</i>           | 0.89                                                                              | 6.46E-03                                                                       | -2.13                                                                  | 2.68E-12                                                            |
| <i>Acsm2</i>           | 2.33                                                                              | NA                                                                             | -4.47                                                                  | 7.57E-18                                                            |
| <i>Acsm3</i>           | 1.08                                                                              | 1.18E-02                                                                       | -2.09                                                                  | 1.05E-08                                                            |

|                 |       |          |       |          |
|-----------------|-------|----------|-------|----------|
| <i>Acsm5</i>    | 1.52  | 1.01E-04 | -2.26 | 1.43E-10 |
| <i>Acss1</i>    | -0.14 | 8.74E-01 | 1.34  | 2.01E-02 |
| <i>Acss2</i>    | 0.80  | 4.84E-02 | -1.64 | 3.90E-07 |
| <i>Acss3</i>    | 1.40  | 7.50E-02 | -4.62 | 2.90E-17 |
| <i>Actb</i>     | -0.44 | 1.00E-01 | 1.23  | 1.32E-05 |
| <i>Actn1</i>    | -0.82 | 8.18E-04 | 1.11  | 2.37E-11 |
| <i>Acvr1b</i>   | -0.32 | 5.97E-01 | -0.62 | 4.04E-02 |
| <i>Acvr2a</i>   | 0.16  | 5.75E-01 | -0.87 | 1.23E-05 |
| <i>Adc</i>      | -1.47 | 1.51E-05 | 0.69  | 8.80E-02 |
| <i>Adh4</i>     | 1.71  | 1.20E-06 | -3.11 | 8.25E-23 |
| <i>Adh5</i>     | 0.62  | 3.43E-02 | -0.98 | 3.93E-05 |
| <i>Adh7</i>     | 0.54  | 2.53E-01 | -1.08 | 8.16E-05 |
| <i>Adi1</i>     | 0.51  | 5.15E-02 | -1.14 | 3.17E-07 |
| <i>Adipor2</i>  | 0.86  | 5.94E-03 | -1.97 | 2.24E-18 |
| <i>Adk</i>      | 0.65  | 8.68E-02 | -1.26 | 1.05E-04 |
| <i>Adra1a</i>   | 2.44  | 5.43E-08 | -4.07 | 3.61E-22 |
| <i>Adssl1</i>   | -0.55 | 2.94E-01 | -0.60 | 2.52E-02 |
| <i>Afmid</i>    | 0.76  | 1.50E-02 | -1.85 | 1.84E-13 |
| <i>Afp</i>      | -1.45 | 2.57E-02 | 5.97  | 2.40E-90 |
| <i>Agmat</i>    | 1.18  | 3.13E-03 | -1.77 | 4.44E-11 |
| <i>Agpat1</i>   | 0.10  | 8.19E-01 | 0.85  | 9.74E-04 |
| <i>Agpat2</i>   | 0.42  | 2.26E-01 | -1.09 | 5.59E-04 |
| <i>Agpat4</i>   | 0.60  | NA       | 1.09  | 2.12E-02 |
| <i>Agpat6</i>   | 0.40  | 2.76E-01 | -1.48 | 1.89E-48 |
| <i>Agphd1</i>   | 0.98  | 6.06E-03 | -2.58 | 2.23E-18 |
| <i>Agxt</i>     | -0.64 | 3.28E-01 | -1.13 | 2.00E-03 |
| <i>Agxt2</i>    | 0.16  | 8.17E-01 | -1.05 | 2.06E-03 |
| <i>Agxt2l1</i>  | 1.38  | 1.33E-02 | -4.24 | 2.43E-18 |
| <i>Ahcy</i>     | 0.83  | 9.71E-02 | -1.63 | 2.81E-08 |
| <i>Ahcyl1</i>   | 0.30  | 2.38E-03 | -0.66 | 1.05E-07 |
| <i>Ahcyl2</i>   | 0.80  | 1.28E-03 | -1.35 | 4.53E-07 |
| <i>Ak1</i>      | -1.29 | 5.30E-02 | 2.61  | 5.33E-05 |
| <i>Ak2</i>      | 0.44  | 1.84E-01 | -0.76 | 2.24E-03 |
| <i>Ak7</i>      | -2.44 | 1.45E-03 | 2.24  | 1.65E-02 |
| <i>Ak8</i>      | -0.31 | 8.20E-01 | 2.45  | 3.70E-02 |
| <i>Akr1b10</i>  | -0.82 | 1.51E-03 | 2.17  | 1.36E-13 |
| <i>Akr1b7</i>   | -1.80 | 8.60E-04 | 6.07  | 4.71E-21 |
| <i>Akr1b8</i>   | -1.08 | 3.43E-02 | 1.71  | 9.21E-04 |
| <i>Akr1c18</i>  | -1.32 | 1.89E-01 | 10.35 | 1.95E-97 |
| <i>Akr1d1</i>   | 1.43  | 4.13E-05 | -1.94 | 2.20E-08 |
| <i>Akt2</i>     | 0.07  | 8.34E-01 | -0.62 | 1.47E-07 |
| <i>Alad</i>     | 0.59  | 1.94E-01 | -0.73 | 1.54E-02 |
| <i>Alas1</i>    | 1.89  | 1.16E-04 | -0.90 | 1.19E-01 |
| <i>Alas2</i>    | 0.47  | 4.58E-01 | -2.74 | 3.36E-09 |
| <i>Aldh18a1</i> | -0.40 | 6.45E-01 | 2.97  | 8.41E-31 |

|                 |       |          |       |          |
|-----------------|-------|----------|-------|----------|
| <i>Aldh1a1</i>  | 2.51  | 4.95E-17 | -2.78 | 6.08E-17 |
| <i>Aldh1a2</i>  | 0.15  | 9.02E-01 | 2.75  | 1.66E-04 |
| <i>Aldh1a7</i>  | 2.37  | 4.96E-16 | -1.90 | 1.09E-08 |
| <i>Aldh1b1</i>  | -0.36 | 6.00E-01 | 0.96  | 1.79E-03 |
| <i>Aldh2</i>    | 0.37  | 4.34E-01 | -1.13 | 1.02E-06 |
| <i>Aldh3a2</i>  | 1.58  | 2.18E-06 | -2.27 | 2.19E-14 |
| <i>Aldh3b1</i>  | -1.01 | 5.23E-05 | 2.03  | 1.61E-12 |
| <i>Aldh3b2</i>  | -0.42 | NA       | 2.67  | 4.20E-02 |
| <i>Aldh4a1</i>  | 0.35  | 4.49E-01 | -1.73 | 2.59E-20 |
| <i>Aldh5a1</i>  | 0.82  | 1.61E-03 | -1.39 | 1.91E-13 |
| <i>Aldh6a1</i>  | 0.60  | 2.44E-01 | -2.00 | 7.82E-17 |
| <i>Aldh7a1</i>  | 0.88  | 4.81E-03 | -1.59 | 1.57E-11 |
| <i>Aldh9a1</i>  | -0.01 | 9.88E-01 | -0.91 | 1.80E-03 |
| <i>Aldoa</i>    | -0.27 | 5.88E-01 | 1.25  | 6.89E-04 |
| <i>Aldoart1</i> | -0.23 | 6.80E-01 | 0.87  | 3.74E-02 |
| <i>Aldob</i>    | 0.76  | 3.39E-02 | -0.57 | 1.70E-01 |
| <i>Alg10b</i>   | 0.21  | 6.39E-01 | -2.04 | 9.27E-12 |
| <i>Alg12</i>    | -0.66 | 3.72E-02 | 1.19  | 7.68E-07 |
| <i>Allc</i>     | -2.30 | NA       | 3.19  | 1.11E-02 |
| <i>Alox12</i>   | -1.10 | 1.64E-03 | 1.41  | 1.82E-04 |
| <i>Alox5</i>    | -0.23 | 8.58E-01 | 6.78  | 1.53E-30 |
| <i>Amacr</i>    | 0.48  | 3.57E-01 | -1.84 | 5.14E-17 |
| <i>Amdhd1</i>   | -0.22 | 7.60E-01 | -0.67 | 4.77E-02 |
| <i>Amt</i>      | 0.93  | 9.66E-06 | -2.10 | 2.19E-21 |
| <i>Amy1</i>     | 0.75  | 5.61E-02 | -1.18 | 6.45E-05 |
| <i>Aoc2</i>     | -0.51 | 1.35E-01 | 1.52  | 5.77E-09 |
| <i>Aox1</i>     | 0.50  | 2.33E-01 | -0.93 | 8.20E-03 |
| <i>Aox3</i>     | 1.39  | 6.34E-03 | -3.80 | 1.85E-27 |
| <i>Arhgap5</i>  | 0.66  | 9.50E-02 | -1.53 | 1.17E-04 |
| <i>Arsb</i>     | 0.30  | 1.15E-01 | -0.71 | 1.71E-07 |
| <i>Art2a-ps</i> | -0.62 | 4.96E-01 | 2.52  | 6.42E-03 |
| <i>Asl</i>      | 0.66  | 1.74E-01 | -1.50 | 6.13E-11 |
| <i>Asns</i>     | -0.47 | 4.03E-01 | 3.17  | 1.26E-11 |
| <i>Aspa</i>     | 1.80  | 4.29E-05 | -2.79 | 6.91E-14 |
| <i>Ass1</i>     | 0.50  | 4.76E-01 | -1.71 | 5.09E-07 |
| <i>Atp5a1</i>   | 0.44  | 4.68E-02 | -1.18 | 1.59E-14 |
| <i>Atp5b</i>    | 0.37  | 1.07E-01 | -1.11 | 1.15E-09 |
| <i>Atp5c1</i>   | 0.39  | 8.42E-02 | -0.68 | 2.91E-04 |
| <i>Atp5f1</i>   | 0.32  | 2.37E-01 | -0.66 | 1.23E-03 |
| <i>Atp6v0a2</i> | 0.16  | 6.24E-01 | -0.73 | 1.24E-02 |
| <i>Atp6v0d2</i> | 0.72  | 3.21E-01 | 2.19  | 2.38E-03 |
| <i>Atp6v0e</i>  | 0.04  | 9.02E-01 | 0.71  | 9.78E-06 |
| <i>Atp6v0e2</i> | -1.30 | 6.89E-03 | 0.80  | 1.44E-01 |
| <i>Atp6v1a</i>  | 0.13  | 5.94E-01 | -0.82 | 4.76E-05 |
| <i>Auh</i>      | 0.64  | 3.69E-02 | -0.93 | 1.12E-05 |



|                |       |          |       |           |
|----------------|-------|----------|-------|-----------|
| <i>Awat2</i>   | 0.81  | 8.64E-02 | -0.97 | 2.74E-02  |
| <i>B3galt4</i> | -0.33 | 5.81E-01 | 1.38  | 1.80E-02  |
| <i>B3galt6</i> | -0.48 | 6.86E-02 | 1.00  | 1.26E-05  |
| <i>B4galt2</i> | -1.08 | 7.71E-02 | 2.09  | 1.19E-03  |
| <i>B4galt4</i> | -0.35 | 2.51E-01 | 1.18  | 3.09E-04  |
| <i>B4galt6</i> | -1.19 | 1.92E-04 | 4.89  | 4.64E-108 |
| <i>Baat</i>    | 1.82  | 1.44E-08 | -2.14 | 5.77E-10  |
| <i>Bag4</i>    | 0.77  | 2.48E-02 | -2.26 | 6.30E-74  |
| <i>Bckdha</i>  | 0.61  | 5.64E-02 | -1.11 | 1.06E-04  |
| <i>Bcl10</i>   | -0.16 | 5.36E-01 | 1.12  | 1.36E-08  |
| <i>Bcl2</i>    | -0.14 | 8.57E-01 | 2.35  | 1.12E-13  |
| <i>Bcl2a1a</i> | 0.21  | 8.45E-01 | 3.60  | 1.82E-04  |
| <i>Bcl2a1b</i> | -0.26 | 7.85E-01 | 3.40  | 1.27E-07  |
| <i>Bcl2a1d</i> | -0.42 | 6.34E-01 | 3.19  | 2.33E-05  |
| <i>Bcl2l1</i>  | -0.96 | 1.10E-03 | 1.67  | 5.40E-10  |
| <i>Bcmo1</i>   | -1.48 | 2.71E-03 | 2.68  | 1.40E-15  |
| <i>Bhmt</i>    | 2.19  | 5.52E-08 | -1.70 | 1.31E-04  |
| <i>Bhmt2</i>   | 0.68  | 4.45E-02 | -1.37 | 9.21E-06  |
| <i>Blnk</i>    | -1.19 | 1.43E-02 | 2.29  | 2.65E-05  |
| <i>Bmp4</i>    | 0.50  | 6.03E-01 | 1.47  | 9.72E-05  |
| <i>Bmp5</i>    | 0.31  | 5.72E-01 | -1.61 | 2.14E-04  |
| <i>Bmp7</i>    | -1.06 | 1.20E-01 | 3.13  | 1.54E-14  |
| <i>Bmp8b</i>   | -1.18 | 2.56E-01 | 5.34  | 3.89E-13  |
| <i>Bmpr2</i>   | 0.54  | 2.11E-01 | -1.02 | 9.65E-03  |
| <i>Bpnt1</i>   | 0.51  | 1.09E-02 | -1.20 | 1.46E-10  |
| <i>Braf</i>    | 0.24  | 3.83E-01 | -0.75 | 8.44E-04  |
| <i>Btd</i>     | 0.53  | 5.11E-02 | -0.72 | 5.90E-03  |
| <i>Btk</i>     | -0.12 | 8.24E-01 | 0.99  | 6.56E-03  |
| <i>C1galt1</i> | 0.18  | 5.90E-01 | -1.41 | 1.04E-10  |
| <i>Camkk2</i>  | 0.77  | 2.49E-03 | -1.36 | 1.17E-05  |
| <i>Card11</i>  | -0.32 | 6.41E-01 | 1.96  | 1.35E-04  |
| <i>Cat</i>     | 0.98  | 8.44E-04 | -1.84 | 3.38E-13  |
| <i>Cav1</i>    | 1.34  | NA       | 1.49  | 1.94E-02  |
| <i>Cav2</i>    | -0.01 | 9.87E-01 | 2.39  | 3.05E-13  |
| <i>Cbr1</i>    | 0.09  | 8.95E-01 | 1.67  | 5.90E-07  |
| <i>Cbr2</i>    | 0.05  | 9.74E-01 | 2.89  | 1.12E-02  |
| <i>Cbr3</i>    | 0.74  | 1.65E-01 | 6.13  | 2.30E-34  |
| <i>Cbs</i>     | 0.00  | 9.95E-01 | -1.55 | 8.55E-09  |
| <i>Ccbl1</i>   | -1.65 | 5.49E-06 | 0.64  | 6.06E-02  |
| <i>Ccl4</i>    | -0.05 | 9.66E-01 | 3.08  | 8.39E-06  |
| <i>Ccna2</i>   | 0.34  | 6.67E-01 | 3.39  | 1.24E-14  |
| <i>Ccnd1</i>   | -0.17 | 7.91E-01 | 1.98  | 3.22E-10  |
| <i>Cd14</i>    | -1.53 | 2.02E-03 | 5.18  | 3.01E-35  |
| <i>Cd36</i>    | 1.32  | 5.49E-06 | 1.48  | 1.26E-06  |
| <i>Cd38</i>    | -0.62 | 5.94E-02 | 0.99  | 9.34E-04  |

|                  |       |          |       |          |
|------------------|-------|----------|-------|----------|
| <i>Cd40</i>      | -2.19 | 2.88E-13 | 4.51  | 2.40E-29 |
| <i>Cdkn2b</i>    | -1.79 | 5.15E-06 | 7.12  | 5.46E-73 |
| <i>Cdo1</i>      | 0.33  | 4.53E-01 | -1.35 | 3.78E-07 |
| <i>Ces1c</i>     | 0.58  | 2.19E-02 | -1.45 | 3.54E-10 |
| <i>Ces1d</i>     | 1.77  | 1.94E-04 | -3.12 | 6.02E-24 |
| <i>Ces1e</i>     | 2.58  | 2.08E-08 | -3.32 | 6.14E-52 |
| <i>Ch25h</i>     | -0.21 | 8.62E-01 | 3.99  | 3.24E-06 |
| <i>Chad</i>      | 0.09  | 8.99E-01 | -1.05 | 9.33E-03 |
| <i>Chdh</i>      | 0.70  | 7.16E-02 | -1.57 | 2.99E-05 |
| <i>Chka</i>      | -0.79 | 3.80E-01 | 2.26  | 7.08E-03 |
| <i>Chpf</i>      | -0.66 | 1.94E-01 | 2.16  | 4.54E-10 |
| <i>Chpt1</i>     | 1.36  | 6.14E-05 | -2.48 | 1.13E-24 |
| <i>Chsy3</i>     | -0.72 | 5.63E-02 | 1.02  | 7.94E-04 |
| <i>Chuk</i>      | 0.33  | 3.51E-01 | -1.22 | 2.62E-15 |
| <i>Ckb</i>       | -0.25 | 7.08E-01 | 1.14  | 2.09E-02 |
| <i>Ckmt1</i>     | -1.85 | 3.22E-03 | 1.85  | 1.91E-02 |
| <i>Cmb1</i>      | 1.02  | 2.98E-03 | -1.97 | 3.48E-16 |
| <i>Coasy</i>     | 0.65  | 7.57E-03 | -1.31 | 9.49E-11 |
| <i>Col4a1</i>    | -0.07 | 9.47E-01 | 1.53  | 7.18E-03 |
| <i>Col4a3</i>    | -1.33 | 1.25E-02 | 5.63  | 3.72E-38 |
| <i>Col4a4</i>    | -0.90 | 1.60E-01 | 4.04  | 7.26E-13 |
| <i>Col4a5</i>    | 0.13  | 9.07E-01 | 1.96  | 5.16E-07 |
| <i>Col6a5</i>    | 0.66  | 4.80E-01 | 2.03  | 5.12E-03 |
| <i>Col6a6</i>    | -0.51 | 6.08E-01 | 1.42  | 4.13E-02 |
| <i>Comt</i>      | 1.04  | 8.74E-12 | -1.82 | 3.26E-37 |
| <i>Cox15</i>     | 0.13  | 6.36E-01 | -0.64 | 3.41E-04 |
| <i>Cox5a</i>     | 0.30  | 2.70E-01 | -0.64 | 1.50E-03 |
| <i>Cox6a2</i>    | -1.16 | 2.22E-01 | 2.80  | 9.80E-03 |
| <i>Cox6b2</i>    | -1.20 | 6.85E-02 | 1.58  | 3.12E-02 |
| <i>Cpox</i>      | 1.03  | 1.50E-04 | -2.61 | 6.72E-30 |
| <i>Cps1</i>      | 0.27  | 6.39E-01 | -3.04 | 2.09E-33 |
| <i>Cpt1c</i>     | -1.72 | 5.96E-04 | 2.47  | 1.75E-05 |
| <i>Cpt2</i>      | 1.03  | 6.76E-07 | -2.00 | 3.50E-29 |
| <i>Creb3l1</i>   | -0.72 | 3.01E-01 | 1.66  | 1.21E-02 |
| <i>Creb3l2</i>   | -0.31 | 6.25E-01 | 0.80  | 4.74E-02 |
| <i>Creb3l3</i>   | 0.35  | 5.10E-01 | -1.38 | 1.13E-05 |
| <i>Creb5</i>     | -0.81 | 3.07E-01 | 3.02  | 2.52E-03 |
| <i>Crebbp</i>    | -0.06 | 8.53E-01 | -0.75 | 1.20E-03 |
| <i>Crkl</i>      | 0.08  | 8.92E-01 | -0.70 | 2.69E-02 |
| <i>Crtc2</i>     | 0.21  | 4.66E-01 | -0.70 | 1.36E-04 |
| <i>Cryl1</i>     | 0.94  | 1.12E-01 | -0.96 | 3.66E-02 |
| <i>Cs</i>        | 0.52  | 5.60E-03 | -1.02 | 4.68E-07 |
| <i>Csad</i>      | 2.25  | 7.54E-09 | -2.82 | 9.85E-15 |
| <i>Csf1</i>      | 0.96  | 2.64E-02 | 0.35  | 2.38E-01 |
| <i>Csgalnact</i> | -0.64 | 3.25E-01 | 1.47  | 1.89E-02 |

|                 |       |          |       |          |
|-----------------|-------|----------|-------|----------|
| <i>Csl</i>      | 0.65  | 3.86E-04 | -1.66 | 4.85E-16 |
| <i>Cth</i>      | 1.03  | 6.86E-03 | -2.43 | 1.88E-23 |
| <i>Ctps</i>     | 0.76  | 1.85E-01 | 1.79  | 5.61E-10 |
| <i>Ctps2</i>    | -0.05 | 9.40E-01 | 1.29  | 1.09E-09 |
| <i>Cul1</i>     | 0.21  | 1.59E-01 | -0.62 | 3.95E-05 |
| <i>Cxcl1</i>    | -0.99 | 1.68E-03 | 2.47  | 3.87E-10 |
| <i>Cxcl12</i>   | 1.14  | 1.86E-03 | -2.50 | 1.23E-11 |
| <i>Cxcl2</i>    | -1.22 | 9.13E-02 | 3.22  | 1.17E-04 |
| <i>Cyc1</i>     | 0.34  | 1.70E-01 | -0.90 | 1.09E-05 |
| <i>Cyp11b2</i>  | -1.49 | NA       | 2.78  | 3.21E-02 |
| <i>Cyp17a1</i>  | -2.13 | 3.02E-03 | 2.84  | 1.01E-03 |
| <i>Cyp1a1</i>   | -1.48 | 3.21E-02 | 1.16  | 8.84E-02 |
| <i>Cyp1a2</i>   | 1.27  | 4.75E-02 | -3.35 | 1.02E-17 |
| <i>Cyp1b1</i>   | 0.18  | 8.58E-01 | 1.53  | 2.76E-02 |
| <i>Cyp26a1</i>  | 0.31  | 7.38E-01 | -1.25 | 3.72E-02 |
| <i>Cyp27a1</i>  | 1.47  | 1.07E-05 | -2.88 | 4.48E-35 |
| <i>Cyp2a4</i>   | -0.78 | 5.16E-01 | 7.76  | 8.64E-21 |
| <i>Cyp2b10</i>  | 1.83  | NA       | -4.64 | 4.05E-13 |
| <i>Cyp2b13</i>  | -1.12 | NA       | 5.63  | 3.94E-07 |
| <i>Cyp2b9</i>   | -0.73 | 5.61E-01 | 3.69  | 1.55E-04 |
| <i>Cyp2c29</i>  | 2.26  | 6.95E-05 | -4.80 | NA       |
| <i>Cyp2c37</i>  | 2.62  | NA       | -3.77 | 7.49E-26 |
| <i>Cyp2c38</i>  | 2.20  | 4.68E-05 | -2.29 | 6.87E-06 |
| <i>Cyp2c44</i>  | 1.57  | 8.82E-03 | -2.94 | 1.73E-07 |
| <i>Cyp2c50</i>  | 2.76  | 7.53E-07 | -4.56 | 6.09E-29 |
| <i>Cyp2c54</i>  | 2.88  | 6.32E-06 | -4.67 | 3.01E-20 |
| <i>Cyp2c55</i>  | 1.03  | 1.71E-01 | -2.90 | 2.21E-12 |
| <i>Cyp2d10</i>  | 0.18  | 7.56E-01 | -0.83 | 3.25E-03 |
| <i>Cyp2d12</i>  | 2.58  | 3.31E-06 | -1.23 | 1.37E-01 |
| <i>Cyp2d22</i>  | 0.00  | 9.95E-01 | -0.99 | 2.77E-06 |
| <i>Cyp2d40</i>  | 0.93  | 9.77E-02 | -2.45 | 6.74E-22 |
| <i>Cyp2d9</i>   | -0.45 | 4.32E-01 | -2.67 | 4.28E-21 |
| <i>Cyp2e1</i>   | 1.92  | 2.91E-03 | -3.88 | 3.24E-15 |
| <i>Cyp2j5</i>   | 2.00  | 1.96E-04 | -3.35 | 5.57E-06 |
| <i>Cyp2j9</i>   | 1.69  | 2.60E-03 | -2.27 | 1.79E-04 |
| <i>Cyp2r1</i>   | 0.41  | 3.27E-01 | -1.05 | 8.72E-04 |
| <i>Cyp2u1</i>   | -0.60 | 4.70E-01 | -2.45 | 2.88E-10 |
| <i>Cyp39a1</i>  | -1.11 | 2.86E-02 | 1.03  | 2.64E-03 |
| <i>Cyp3a11</i>  | 1.37  | 3.15E-02 | -2.65 | 3.48E-10 |
| <i>Cyp3a13</i>  | 0.10  | 8.64E-01 | -0.75 | 5.05E-03 |
| <i>Cyp3a16</i>  | 0.36  | NA       | 3.48  | 4.81E-03 |
| <i>Cyp3a25</i>  | 1.25  | 2.87E-02 | -2.08 | 9.84E-06 |
| <i>Cyp3a41a</i> | -0.13 | NA       | 2.66  | 4.28E-02 |
| <i>Cyp46a1</i>  | 0.88  | 3.58E-01 | -1.95 | 3.54E-04 |
| <i>Cyp4a10</i>  | 2.60  | NA       | -4.53 | 1.82E-09 |

|                 |       |          |       |           |
|-----------------|-------|----------|-------|-----------|
| <i>Cyp4a12a</i> | 3.54  | 1.05E-08 | -3.25 | 7.27E-05  |
| <i>Cyp4a12b</i> | 1.70  | 3.26E-02 | -3.76 | 3.83E-05  |
| <i>Cyp4a32</i>  | 1.02  | 1.88E-01 | -4.18 | 2.29E-24  |
| <i>Cyp4f13</i>  | 0.35  | 2.75E-01 | -0.96 | 6.14E-08  |
| <i>Cyp4f14</i>  | 1.53  | 2.18E-03 | -3.23 | 4.98E-12  |
| <i>Cyp4f18</i>  | -0.24 | 8.36E-01 | 2.18  | 3.76E-04  |
| <i>Cyp7a1</i>   | 2.79  | 1.31E-13 | -3.26 | 1.19E-09  |
| <i>Cyp7b1</i>   | 1.67  | 1.21E-03 | -5.10 | 4.15E-28  |
| <i>Cyp8b1</i>   | 1.49  | 2.51E-03 | -5.41 | NA        |
| <i>Dbt</i>      | -0.17 | 7.63E-01 | -1.10 | 9.89E-07  |
| <i>Dct</i>      | -0.18 | 9.00E-01 | -3.59 | 8.20E-08  |
| <i>Dctd</i>     | -1.21 | 1.22E-01 | 3.42  | 1.92E-05  |
| <i>Dcxr</i>     | 0.52  | 3.31E-01 | -1.05 | 5.20E-04  |
| <i>Ddc</i>      | 1.40  | 1.78E-03 | -2.33 | 4.46E-08  |
| <i>Degs2</i>    | -0.02 | 9.83E-01 | 1.94  | 9.78E-04  |
| <i>Dgat2</i>    | -0.17 | 7.59E-01 | -0.77 | 7.87E-03  |
| <i>Dgke</i>     | -0.09 | 8.45E-01 | 1.02  | 8.75E-04  |
| <i>Dgkq</i>     | 0.47  | 8.84E-05 | -0.61 | 8.60E-05  |
| <i>Dgkz</i>     | -0.66 | 9.36E-03 | 1.37  | 2.33E-07  |
| <i>Dhrs3</i>    | 0.88  | 1.40E-03 | -1.00 | 5.25E-11  |
| <i>Dhrs4</i>    | 1.17  | 1.73E-05 | -1.77 | 4.72E-10  |
| <i>Dhrs9</i>    | -0.43 | 6.49E-01 | 1.67  | 1.50E-03  |
| <i>Diap1</i>    | 0.12  | 7.27E-01 | -1.22 | 2.49E-07  |
| <i>Dlat</i>     | 0.86  | 2.62E-06 | -1.52 | 6.75E-15  |
| <i>Dld</i>      | 0.59  | 3.21E-03 | -1.10 | 5.35E-13  |
| <i>Dlst</i>     | 0.18  | 7.41E-01 | -0.93 | 6.57E-09  |
| <i>Dmgdh</i>    | 1.76  | 7.34E-07 | -2.69 | 2.10E-35  |
| <i>Dock1</i>    | -0.07 | 8.78E-01 | -0.67 | 1.06E-02  |
| <i>Dpm2</i>     | -0.31 | 2.06E-01 | 0.78  | 1.12E-03  |
| <i>Dpyd</i>     | 1.17  | 4.75E-03 | -2.91 | 1.25E-48  |
| <i>Dpys</i>     | 1.36  | 4.29E-04 | -2.97 | 1.41E-20  |
| <i>Ebp</i>      | 0.36  | 3.99E-01 | -1.04 | 2.63E-04  |
| <i>Echs1</i>    | 0.38  | 1.56E-01 | -1.08 | 9.81E-07  |
| <i>Eci1</i>     | 1.18  | 2.75E-04 | -1.71 | 1.54E-12  |
| <i>Eci2</i>     | 1.08  | 1.34E-04 | -1.66 | 5.45E-11  |
| <i>Edn1</i>     | -0.95 | 3.13E-02 | 1.38  | 6.44E-03  |
| <i>Eef2k</i>    | 0.57  | 1.85E-01 | -1.12 | 2.56E-03  |
| <i>Egfr</i>     | 0.54  | 2.45E-01 | -1.64 | 6.19E-08  |
| <i>Ehhadh</i>   | 1.62  | 1.75E-04 | -2.70 | 3.13E-14  |
| <i>Eif4ebp1</i> | -0.49 | 8.50E-04 | 0.96  | 2.54E-06  |
| <i>Enoph1</i>   | 0.18  | 7.22E-01 | 0.88  | 7.23E-06  |
| <i>Enpp1</i>    | -1.14 | 4.22E-04 | 0.31  | 2.51E-01  |
| <i>Enpp3</i>    | 0.10  | 8.80E-01 | -1.64 | 5.14E-08  |
| <i>Ephx1</i>    | 0.87  | 3.89E-05 | -0.59 | 1.94E-02  |
| <i>Ephx2</i>    | 1.58  | 1.80E-05 | -2.82 | 2.98E-116 |

|                |       |          |       |          |
|----------------|-------|----------|-------|----------|
| <i>Ept1</i>    | 0.45  | 2.02E-01 | -1.84 | 5.16E-13 |
| <i>Erc1</i>    | 0.31  | 1.93E-01 | -1.20 | 2.16E-06 |
| <i>Etnk2</i>   | 0.00  | 1.00E+00 | -1.47 | 3.12E-07 |
| <i>Extl1</i>   | -0.15 | 9.03E-01 | -1.31 | 1.95E-02 |
| <i>Fah</i>     | 0.29  | 5.21E-01 | -0.92 | 3.12E-04 |
| <i>Fahd1</i>   | 0.81  | 4.45E-03 | -1.25 | 1.24E-06 |
| <i>Fbp1</i>    | 0.49  | 7.77E-02 | -1.63 | 1.40E-17 |
| <i>Fech</i>    | 0.20  | 6.49E-01 | -0.75 | 7.49E-03 |
| <i>Fh1</i>     | 0.26  | 4.58E-01 | -0.78 | 1.33E-03 |
| <i>Figf</i>    | -0.40 | 7.74E-02 | 1.00  | 1.99E-05 |
| <i>Flad1</i>   | 0.10  | 7.59E-01 | -0.77 | 4.66E-05 |
| <i>Flna</i>    | 0.00  | 9.98E-01 | 1.29  | 2.42E-03 |
| <i>Flncl</i>   | -0.05 | 9.74E-01 | 2.32  | 3.67E-03 |
| <i>Flt4</i>    | -0.96 | 1.64E-03 | 0.84  | 7.21E-03 |
| <i>Fn1</i>     | -0.81 | 1.89E-04 | 0.24  | 3.84E-01 |
| <i>Fos</i>     | -1.11 | 2.19E-02 | -0.38 | 7.17E-01 |
| <i>Foxo1</i>   | -0.21 | 4.96E-01 | -0.67 | 1.75E-03 |
| <i>Foxo3</i>   | 0.12  | 8.66E-01 | -2.12 | 4.41E-08 |
| <i>Fpgs</i>    | 0.44  | 1.79E-02 | -1.71 | 1.64E-20 |
| <i>Fst</i>     | -3.10 | 1.67E-07 | 2.72  | 5.62E-10 |
| <i>Fut1</i>    | 0.52  | 6.69E-01 | 2.21  | 2.04E-02 |
| <i>Fut4</i>    | -0.04 | 9.69E-01 | 1.62  | 2.83E-02 |
| <i>Fut7</i>    | -2.00 | 6.01E-06 | 4.09  | 4.02E-10 |
| <i>Fyn</i>     | -0.37 | 3.53E-01 | 0.86  | 2.20E-02 |
| <i>G6pc</i>    | 1.77  | 1.02E-02 | -3.61 | 1.15E-06 |
| <i>G6pd2</i>   | -0.59 | 3.23E-01 | 2.13  | 1.58E-06 |
| <i>G6pdx</i>   | -0.85 | 8.63E-02 | 2.54  | 2.47E-08 |
| <i>Gadd45b</i> | 0.95  | 8.76E-02 | 1.08  | 2.49E-02 |
| <i>Gale</i>    | -0.54 | 2.84E-01 | 1.00  | 1.05E-03 |
| <i>Galk1</i>   | 0.12  | 6.93E-01 | 0.63  | 6.57E-03 |
| <i>Galm</i>    | 0.79  | 6.09E-03 | -1.56 | 2.12E-09 |
| <i>Galns</i>   | 0.03  | 9.50E-01 | 0.85  | 9.01E-07 |
| <i>Galnt1</i>  | 0.21  | 4.13E-01 | -0.74 | 3.60E-03 |
| <i>Galnt10</i> | -0.90 | 5.61E-03 | 1.64  | 1.24E-05 |
| <i>Galnt12</i> | -0.37 | 6.33E-01 | 2.95  | 3.54E-06 |
| <i>Galnt3</i>  | -0.41 | 5.65E-01 | 2.37  | 1.91E-05 |
| <i>Galnt4</i>  | -0.02 | 9.57E-01 | -0.84 | 7.41E-07 |
| <i>Galnt6</i>  | -3.17 | 1.06E-07 | 5.02  | 6.19E-10 |
| <i>Galntl2</i> | -0.67 | 2.22E-01 | 1.43  | 6.18E-03 |
| <i>Galntl4</i> | -0.63 | 2.96E-02 | 1.65  | 5.97E-07 |
| <i>Gapdh</i>   | -0.14 | 8.81E-01 | 1.21  | 2.39E-02 |
| <i>Gapdhs</i>  | -0.15 | 8.20E-01 | -1.03 | 9.70E-03 |
| <i>Gatc</i>    | 0.44  | 6.71E-03 | -0.82 | 1.14E-10 |
| <i>Gba2</i>    | 0.06  | 9.01E-01 | -0.66 | 5.62E-03 |
| <i>Gcdh</i>    | 0.94  | 2.49E-02 | -1.89 | 2.61E-20 |

|                |       |          |       |          |
|----------------|-------|----------|-------|----------|
| <i>Gch1</i>    | 0.29  | 4.74E-01 | -0.99 | 6.00E-04 |
| <i>Gck</i>     | 1.49  | 7.62E-04 | -0.35 | 5.46E-01 |
| <i>Gclm</i>    | 0.67  | 2.94E-03 | -0.62 | 1.45E-03 |
| <i>Gcnt1</i>   | 0.26  | 7.49E-01 | 1.55  | 1.67E-04 |
| <i>Gcnt2</i>   | -0.69 | 2.44E-02 | 0.79  | 4.15E-03 |
| <i>Gfpt1</i>   | -0.13 | 7.49E-01 | 1.01  | 2.43E-04 |
| <i>Ggt6</i>    | 1.04  | 4.01E-06 | -1.51 | 1.73E-11 |
| <i>Glb1</i>    | -0.64 | 4.05E-02 | 0.36  | 2.57E-01 |
| <i>Gldc</i>    | -0.03 | 9.57E-01 | -1.09 | 1.05E-03 |
| <i>Gls</i>     | -0.53 | 3.37E-01 | 1.90  | 2.05E-06 |
| <i>Gls2</i>    | -0.09 | 9.31E-01 | -1.18 | 2.06E-04 |
| <i>Glt28d2</i> | 0.07  | 9.14E-01 | -0.81 | 2.91E-02 |
| <i>Glul</i>    | 1.46  | 7.98E-03 | -3.01 | 1.70E-11 |
| <i>Glyctk</i>  | 0.12  | 8.03E-01 | -1.11 | 1.06E-05 |
| <i>Gm5506</i>  | 1.50  | 3.50E-03 | -0.87 | 1.08E-01 |
| <i>Gmppb</i>   | -0.29 | 5.12E-01 | 1.05  | 4.17E-04 |
| <i>Gne</i>     | 0.07  | 9.25E-01 | -1.01 | 1.53E-02 |
| <i>Gnpda1</i>  | 0.37  | 3.82E-01 | -1.19 | 2.37E-04 |
| <i>Gns</i>     | 0.01  | 9.83E-01 | -0.61 | 2.17E-07 |
| <i>Got1</i>    | -0.44 | 5.35E-01 | -1.43 | 2.88E-05 |
| <i>Got2</i>    | 0.45  | 8.17E-02 | -0.73 | 2.35E-03 |
| <i>Gpam</i>    | -0.43 | 3.28E-01 | -1.03 | 9.67E-06 |
| <i>Gpat2</i>   | 0.21  | 8.31E-01 | -1.34 | 4.22E-02 |
| <i>Gpi1</i>    | -0.56 | 1.80E-01 | 1.04  | 1.14E-02 |
| <i>Grif1</i>   | 0.06  | 8.20E-01 | -1.19 | 1.51E-10 |
| <i>Gsk3b</i>   | 0.32  | 7.74E-02 | -0.64 | 1.18E-04 |
| <i>Gss</i>     | -0.13 | 8.11E-01 | 1.31  | 5.49E-06 |
| <i>Gsta1</i>   | 0.24  | 8.26E-01 | 5.13  | 7.81E-11 |
| <i>Gsta2</i>   | 1.47  | 1.05E-03 | 0.52  | 2.98E-01 |
| <i>Gsta3</i>   | 0.93  | 1.63E-03 | -1.95 | 2.13E-13 |
| <i>Gsta4</i>   | -0.34 | 4.24E-01 | 1.34  | 2.74E-06 |
| <i>Gstk1</i>   | 1.04  | 2.79E-03 | -1.62 | 4.09E-09 |
| <i>Gstm1</i>   | 0.41  | 2.65E-01 | 1.48  | 8.08E-06 |
| <i>Gstm3</i>   | 1.07  | 8.38E-02 | 1.97  | 2.47E-04 |
| <i>Gstm5</i>   | -0.60 | 2.39E-01 | 1.42  | 6.12E-09 |
| <i>Gstm6</i>   | 0.27  | 5.10E-01 | -0.69 | 1.48E-03 |
| <i>Gsto1</i>   | -0.16 | 8.04E-01 | -0.86 | 2.07E-03 |
| <i>Gstp1</i>   | 0.33  | 2.94E-01 | -1.34 | 5.94E-10 |
| <i>Gstp2</i>   | -1.37 | 9.98E-02 | 4.85  | 1.40E-08 |
| <i>Gstz1</i>   | 0.11  | 8.83E-01 | -0.82 | 4.86E-03 |
| <i>Gulo</i>    | 0.17  | 8.41E-01 | -1.63 | 2.09E-06 |
| <i>Gyk</i>     | 0.81  | 9.57E-03 | -1.26 | 2.22E-04 |
| <i>H19</i>     | -3.04 | 1.14E-04 | 7.46  | 1.45E-21 |
| <i>H2-Ke6</i>  | 0.56  | 1.58E-02 | -0.63 | 1.58E-03 |
| <i>Haao</i>    | 0.80  | 8.91E-02 | -1.51 | 7.09E-06 |

|                 |       |          |       |          |
|-----------------|-------|----------|-------|----------|
| <i>Hadh</i>     | 0.92  | 2.26E-05 | -1.34 | 4.96E-09 |
| <i>Hadha</i>    | 0.49  | 2.75E-02 | -1.56 | 1.65E-14 |
| <i>Hadhb</i>    | 0.44  | 4.93E-02 | -0.68 | 1.93E-04 |
| <i>Hal</i>      | 0.19  | 8.65E-01 | -1.43 | 1.72E-05 |
| <i>Hao1</i>     | -0.34 | 6.35E-01 | -1.12 | 3.34E-05 |
| <i>Hao2</i>     | -0.11 | 9.33E-01 | 3.80  | 3.95E-07 |
| <i>Hexa</i>     | -0.81 | 8.20E-03 | 1.30  | 8.76E-11 |
| <i>Hexb</i>     | 0.15  | 7.18E-01 | 0.92  | 1.13E-05 |
| <i>Hgd</i>      | 0.73  | 8.64E-02 | -1.86 | 1.55E-14 |
| <i>Hgf</i>      | 0.14  | 8.41E-01 | -1.00 | 1.42E-02 |
| <i>Hibadh</i>   | 1.16  | 2.02E-03 | -1.82 | 4.38E-14 |
| <i>Hibch</i>    | 0.42  | 2.27E-01 | -0.99 | 2.85E-04 |
| <i>Hk2</i>      | -0.73 | 2.21E-01 | 2.51  | 1.86E-06 |
| <i>Hk3</i>      | -0.83 | 1.46E-01 | 1.21  | 4.57E-02 |
| <i>Hkdc1</i>    | -1.63 | 1.37E-02 | 2.24  | 9.97E-04 |
| <i>Hmbs</i>     | 0.25  | 2.63E-01 | -0.67 | 3.42E-04 |
| <i>Hmgcl</i>    | 0.57  | 8.64E-02 | -0.95 | 4.86E-04 |
| <i>Hmgcr</i>    | -0.59 | 2.78E-01 | 0.87  | 2.32E-02 |
| <i>Hmgcs2</i>   | 1.15  | 5.05E-05 | -2.02 | 3.97E-13 |
| <i>Hoga1</i>    | 0.27  | 6.33E-01 | -0.81 | 1.02E-02 |
| <i>Hpd</i>      | 1.30  | 9.58E-02 | -3.33 | 4.25E-10 |
| <i>Hpgds</i>    | 0.07  | 9.42E-01 | 2.17  | 1.18E-06 |
| <i>Hsd17b1</i>  | -1.08 | 3.10E-02 | 1.65  | 6.40E-03 |
| <i>Hsd17b10</i> | 0.47  | 1.85E-01 | -0.71 | 8.57E-03 |
| <i>Hsd17b4</i>  | 1.08  | 3.36E-05 | -2.02 | 1.18E-38 |
| <i>Hsd17b7</i>  | -0.05 | 9.33E-01 | -0.95 | 5.41E-04 |
| <i>Hsd3b1</i>   | 0.67  | 5.90E-01 | 2.92  | 2.29E-02 |
| <i>Hsd3b2</i>   | 0.83  | 1.35E-01 | -2.93 | 1.13E-34 |
| <i>Hsd3b7</i>   | 0.82  | 2.11E-02 | -2.66 | 2.60E-62 |
| <i>Hyal1</i>    | 1.23  | 6.54E-04 | -2.75 | 1.77E-14 |
| <i>Hyal3</i>    | 0.60  | 2.40E-01 | -1.31 | 1.94E-03 |
| <i>Icam1</i>    | -0.18 | 8.20E-01 | 1.94  | 1.43E-09 |
| <i>Id1</i>      | -0.87 | 6.26E-02 | 3.27  | 9.98E-11 |
| <i>Idh1</i>     | 0.23  | 5.35E-01 | -1.05 | 5.38E-06 |
| <i>Idh2</i>     | 0.87  | 6.89E-03 | -0.58 | 3.13E-02 |
| <i>Idh3a</i>    | 0.56  | 1.85E-04 | -0.91 | 2.74E-10 |
| <i>Idh3b</i>    | 0.32  | 2.75E-01 | -0.80 | 1.57E-03 |
| <i>Idh3g</i>    | 0.50  | 2.18E-02 | -0.70 | 6.99E-04 |
| <i>Idi1</i>     | 0.42  | 5.53E-01 | -1.55 | 5.83E-04 |
| <i>Ido2</i>     | 0.42  | 5.01E-01 | -1.90 | 9.58E-10 |
| <i>Igf1</i>     | 1.45  | 2.08E-06 | -2.42 | 5.87E-17 |
| <i>Ikbkg</i>    | 0.81  | 4.90E-05 | -0.69 | 1.63E-03 |
| <i>Il1b</i>     | 0.68  | 6.53E-02 | 1.08  | 6.78E-03 |
| <i>Impad1</i>   | 0.30  | 2.12E-01 | -1.09 | 3.75E-10 |
| <i>Impdh1</i>   | -0.79 | 1.11E-01 | 1.95  | 2.25E-06 |

|               |       |          |       |          |
|---------------|-------|----------|-------|----------|
| <i>Inhbb</i>  | -2.10 | 2.24E-04 | 4.44  | 5.34E-14 |
| <i>Inhbc</i>  | 0.69  | 6.74E-03 | -1.90 | 1.68E-10 |
| <i>Inhbe</i>  | 1.95  | 3.66E-08 | -1.65 | 2.02E-10 |
| <i>Inmt</i>   | 3.01  | 5.68E-11 | -2.84 | 7.26E-13 |
| <i>Inpp5b</i> | 0.16  | 4.96E-01 | -0.62 | 2.78E-04 |
| <i>Inpp5j</i> | -1.24 | 1.13E-01 | 4.05  | 1.92E-05 |
| <i>lpmk</i>   | -0.22 | 6.15E-01 | -0.84 | 1.08E-05 |
| <i>Irs1</i>   | 0.23  | 5.79E-01 | -0.79 | 1.39E-02 |
| <i>Irs2</i>   | 0.11  | 8.96E-01 | -2.38 | 2.32E-05 |
| <i>Isyna1</i> | -0.54 | 1.61E-01 | 3.02  | 2.33E-24 |
| <i>Itga11</i> | -1.12 | 4.89E-02 | 2.94  | 1.41E-04 |
| <i>Itga2</i>  | -1.32 | 8.18E-04 | 4.44  | 3.33E-09 |
| <i>Itga2b</i> | -0.77 | 4.29E-02 | 0.09  | 7.94E-01 |
| <i>Itga3</i>  | -0.86 | 7.99E-02 | 2.69  | 1.36E-20 |
| <i>Itga6</i>  | -0.41 | 5.29E-01 | 2.32  | 2.64E-09 |
| <i>Itgav</i>  | -0.41 | 1.42E-01 | 0.81  | 4.12E-04 |
| <i>Itgb3</i>  | -1.24 | 3.02E-02 | 0.86  | NA       |
| <i>Itgb4</i>  | 0.67  | NA       | 1.53  | 1.38E-02 |
| <i>Itgb7</i>  | -0.01 | 9.85E-01 | 1.53  | 2.19E-03 |
| <i>Itpk1</i>  | 0.32  | 2.07E-01 | -1.44 | 8.64E-12 |
| <i>Ivd</i>    | 0.58  | 2.00E-01 | -1.81 | 1.48E-11 |
| <i>Jun</i>    | 0.63  | 8.61E-02 | -1.58 | 2.70E-03 |
| <i>Kdsr</i>   | 0.65  | 1.88E-03 | -0.85 | 2.52E-10 |
| <i>Khk</i>    | 0.58  | 7.36E-02 | -0.79 | 8.47E-03 |
| <i>Kmo</i>    | 0.20  | 7.97E-01 | -1.22 | 1.86E-03 |
| <i>Kynu</i>   | 0.83  | 3.45E-05 | -1.82 | 4.96E-24 |
| <i>Lama1</i>  | 0.49  | 3.27E-01 | -1.38 | 2.65E-04 |
| <i>Lama3</i>  | 0.22  | 7.54E-01 | -2.72 | 1.36E-13 |
| <i>Lama5</i>  | -0.71 | 3.37E-02 | 4.04  | 7.28E-70 |
| <i>Lamb2</i>  | 0.00  | 9.98E-01 | 1.56  | 3.60E-05 |
| <i>Lamb3</i>  | 0.26  | 7.44E-01 | -1.15 | 1.54E-02 |
| <i>Lap3</i>   | 0.49  | 1.07E-01 | -1.35 | 1.23E-10 |
| <i>Lass5</i>  | 0.05  | 9.46E-01 | 0.97  | 1.29E-02 |
| <i>Lass6</i>  | -1.00 | NA       | 1.68  | 7.28E-03 |
| <i>Lat</i>    | -0.26 | 7.88E-01 | 1.95  | 5.95E-03 |
| <i>Lclat1</i> | 0.05  | 9.43E-01 | -0.79 | 3.51E-03 |
| <i>Lepr</i>   | -2.54 | 7.45E-09 | 2.36  | 1.61E-05 |
| <i>Lias</i>   | 0.20  | 4.36E-01 | -0.78 | 3.15E-07 |
| <i>Lif</i>    | -1.13 | 1.34E-02 | 6.40  | 7.59E-28 |
| <i>Lipc</i>   | 0.97  | 4.41E-02 | -2.78 | 5.05E-20 |
| <i>Lipe</i>   | -0.14 | 8.42E-01 | -0.77 | 1.68E-03 |
| <i>Lipg</i>   | 1.89  | 3.87E-03 | -3.75 | 2.39E-25 |
| <i>Lipt1</i>  | 0.60  | 1.31E-03 | -0.71 | 1.16E-04 |
| <i>Lipt2</i>  | 0.21  | 5.61E-01 | 0.70  | 8.02E-03 |
| <i>Lpcat1</i> | -0.98 | 3.14E-02 | 0.70  | 2.25E-01 |



|                |       |          |       |          |
|----------------|-------|----------|-------|----------|
| <i>Lpcat2</i>  | 0.27  | 6.70E-01 | 1.78  | 2.28E-07 |
| <i>Lpcat4</i>  | -0.21 | 7.90E-01 | 1.30  | 1.13E-02 |
| <i>Lpin2</i>   | 0.31  | 5.47E-01 | -1.04 | 3.29E-03 |
| <i>Lpin3</i>   | -0.27 | 5.75E-01 | 1.37  | 1.06E-05 |
| <i>Lrdd</i>    | -0.42 | 4.65E-02 | 0.76  | 3.03E-03 |
| <i>Lss</i>     | -0.53 | 2.89E-01 | 0.97  | 4.79E-04 |
| <i>Lta</i>     | 0.08  | 9.50E-01 | 2.56  | 1.19E-02 |
| <i>Ltb</i>     | -1.40 | 8.82E-03 | 5.27  | 2.31E-43 |
| <i>Ly96</i>    | -0.67 | 3.41E-02 | 1.32  | 1.01E-04 |
| <i>Man1a</i>   | 0.50  | 1.05E-01 | -1.42 | 4.28E-09 |
| <i>Man1c1</i>  | -0.50 | 2.55E-01 | 1.09  | 1.11E-02 |
| <i>Maob</i>    | 0.59  | 2.04E-01 | -1.34 | 4.78E-04 |
| <i>Map3k14</i> | 0.09  | 8.91E-01 | 1.50  | 1.16E-06 |
| <i>Mapk1</i>   | 0.13  | 4.62E-01 | -0.68 | 3.00E-05 |
| <i>Mapk3</i>   | -0.36 | 1.20E-01 | 0.92  | 4.42E-06 |
| <i>Mat1a</i>   | 1.00  | 2.29E-02 | -1.97 | 1.42E-06 |
| <i>Mboat1</i>  | 0.04  | 9.74E-01 | 1.50  | 1.09E-02 |
| <i>Mccc1</i>   | 0.38  | 2.60E-01 | -1.34 | 6.18E-11 |
| <i>Mccc2</i>   | 0.79  | 3.70E-03 | -1.52 | 6.46E-20 |
| <i>Mcee</i>    | 0.86  | 2.20E-03 | -0.66 | 3.59E-03 |
| <i>Mdh1</i>    | 0.88  | 9.80E-03 | -1.58 | 6.47E-12 |
| <i>Me1</i>     | 1.00  | 5.80E-05 | -1.50 | 9.47E-09 |
| <i>Met</i>     | 0.29  | 1.78E-01 | -1.24 | 9.27E-11 |
| <i>Mgam</i>    | 0.65  | 1.47E-02 | -1.18 | 3.27E-09 |
| <i>Mgat4a</i>  | 0.12  | 8.80E-01 | 1.52  | 5.98E-04 |
| <i>Mgat5</i>   | -0.02 | 9.84E-01 | -1.48 | 4.64E-04 |
| <i>Mgl1</i>    | 1.67  | 2.12E-14 | -2.36 | 4.98E-23 |
| <i>Mgst1</i>   | 1.58  | 7.74E-06 | -1.82 | 1.08E-16 |
| <i>Mgst3</i>   | 0.83  | 8.38E-03 | 1.03  | 2.13E-04 |
| <i>Mlycd</i>   | 0.36  | 3.64E-01 | -1.03 | 1.84E-04 |
| <i>Mmab</i>    | -0.33 | 3.41E-01 | -0.64 | 1.99E-02 |
| <i>Mmp14</i>   | -0.74 | 4.45E-02 | 1.04  | 3.78E-03 |
| <i>Mocs1</i>   | -0.16 | 8.00E-01 | -0.92 | 1.95E-04 |
| <i>Mpst</i>    | 0.16  | 8.12E-01 | -0.74 | 1.03E-02 |
| <i>Mtap</i>    | -0.12 | 6.42E-01 | 0.70  | 9.19E-05 |
| <i>Mthfd1</i>  | 0.29  | 5.96E-01 | -1.43 | 2.52E-13 |
| <i>Mthfd1l</i> | -1.52 | 3.69E-04 | 4.16  | 3.96E-20 |
| <i>Mthfd2</i>  | 0.55  | 3.96E-01 | 1.06  | 8.21E-04 |
| <i>Mthfd2l</i> | -0.25 | 4.67E-01 | 1.66  | 1.46E-08 |
| <i>Mtmr1</i>   | 0.23  | 3.21E-01 | -0.65 | 2.13E-03 |
| <i>Mtmr3</i>   | 0.03  | 9.07E-01 | -0.75 | 1.56E-06 |
| <i>Mtmr4</i>   | 0.43  | 2.59E-03 | -1.16 | 8.72E-11 |
| <i>Mtr</i>     | 0.24  | 5.77E-01 | -0.78 | 1.33E-02 |
| <i>Mut</i>     | 0.64  | 9.09E-02 | -1.89 | 2.00E-09 |
| <i>Mvd</i>     | -0.22 | 6.08E-01 | 0.93  | 1.10E-02 |

|                 |       |          |       |          |
|-----------------|-------|----------|-------|----------|
| <i>Myl12a</i>   | 0.30  | 6.29E-01 | 1.17  | 2.85E-13 |
| <i>Myl12b</i>   | 0.24  | 5.64E-01 | 1.20  | 7.41E-07 |
| <i>Myl9</i>     | -0.07 | 9.23E-01 | 0.73  | 3.41E-02 |
| <i>Mylk</i>     | 0.26  | 3.65E-01 | -0.77 | 8.01E-09 |
| <i>Mylk3</i>    | 0.29  | NA       | -1.98 | 1.21E-02 |
| <i>Nadk</i>     | 0.34  | 1.35E-01 | -0.61 | 5.00E-04 |
| <i>Nagk</i>     | -0.47 | 4.98E-02 | 1.19  | 5.55E-08 |
| <i>Nampt</i>    | 0.90  | 2.40E-02 | 0.04  | 8.76E-01 |
| <i>Nans</i>     | -0.72 | 1.94E-04 | 1.45  | 1.04E-12 |
| <i>Naprt1</i>   | 0.54  | 6.40E-02 | -0.67 | 1.93E-02 |
| <i>Nat1</i>     | 2.27  | 5.14E-04 | -3.26 | 2.81E-06 |
| <i>Nat2</i>     | 0.55  | 8.06E-02 | -1.00 | 3.13E-07 |
| <i>Ndst1</i>    | 0.03  | 9.44E-01 | -2.17 | 2.20E-18 |
| <i>Ndst2</i>    | 0.13  | 6.84E-01 | -0.67 | 1.40E-04 |
| <i>Ndufa10</i>  | 0.28  | 2.52E-01 | -0.65 | 1.66E-03 |
| <i>Ndufa9</i>   | 0.30  | 3.23E-01 | -0.70 | 2.50E-04 |
| <i>Ndufb10</i>  | 0.26  | 4.56E-01 | -0.66 | 3.12E-03 |
| <i>Ndufs1</i>   | 0.40  | 7.07E-02 | -1.41 | 6.43E-23 |
| <i>Ndufs2</i>   | 0.12  | 6.94E-01 | -0.64 | 1.62E-05 |
| <i>Ndufv1</i>   | 0.42  | 8.19E-02 | -1.10 | 4.16E-11 |
| <i>Nfkb2</i>    | -0.07 | 9.06E-01 | 1.56  | 8.86E-25 |
| <i>Nfs1</i>     | 0.46  | 1.25E-01 | -0.86 | 3.05E-04 |
| <i>Nme1</i>     | -0.48 | 1.05E-01 | 0.96  | 7.30E-04 |
| <i>Nme2</i>     | -0.37 | 2.59E-01 | 0.86  | 3.79E-03 |
| <i>Nme4</i>     | -0.12 | 8.08E-01 | 0.85  | 1.52E-02 |
| <i>Nme5</i>     | 0.19  | 9.00E-01 | 3.22  | 3.13E-03 |
| <i>Nme6</i>     | -0.90 | 2.21E-03 | 1.21  | 1.15E-05 |
| <i>Nmnat1</i>   | 0.42  | 1.54E-01 | -0.64 | 3.60E-03 |
| <i>Nmnat3</i>   | 0.35  | 3.35E-01 | -0.81 | 9.31E-04 |
| <i>Nnmt</i>     | 1.69  | 1.01E-02 | -2.75 | 1.03E-20 |
| <i>Nnt</i>      | -0.11 | 8.26E-01 | -1.21 | 4.39E-03 |
| <i>Nodal</i>    | -0.62 | 4.73E-01 | 2.12  | 1.33E-05 |
| <i>Nos2</i>     | -0.87 | 3.39E-01 | 4.98  | 7.53E-07 |
| <i>Nos3</i>     | -0.34 | NA       | 1.13  | 2.21E-02 |
| <i>Nt5c</i>     | 0.04  | 8.57E-01 | 0.97  | 1.37E-13 |
| <i>Nt5c3l</i>   | -1.01 | 6.81E-03 | 1.57  | 9.86E-16 |
| <i>Nt5e</i>     | -0.49 | 6.55E-01 | 1.08  | 1.92E-02 |
| <i>Nudt12</i>   | 0.69  | 5.72E-02 | -1.99 | 2.73E-08 |
| <i>Oat</i>      | 2.18  | 7.18E-04 | -3.53 | 1.55E-13 |
| <i>Ogdh</i>     | 0.28  | 1.80E-01 | -1.05 | 1.22E-08 |
| <i>Ogdhl</i>    | -1.50 | 4.84E-02 | 1.67  | 6.39E-02 |
| <i>Otc</i>      | 0.75  | 3.04E-01 | -2.03 | 1.77E-06 |
| <i>Oxsm</i>     | 0.72  | 2.47E-02 | -1.50 | 2.39E-07 |
| <i>P4ha1</i>    | 0.08  | 9.42E-01 | 1.31  | 1.03E-02 |
| <i>Pafah1b3</i> | -1.09 | 1.08E-02 | 2.27  | 1.14E-13 |

|                 |       |          |       |          |
|-----------------|-------|----------|-------|----------|
| <i>Pafah2</i>   | 0.02  | 9.71E-01 | -0.94 | 1.26E-04 |
| <i>Pah</i>      | 1.00  | 1.11E-01 | -2.60 | 7.17E-09 |
| <i>Paics</i>    | 0.57  | 2.26E-02 | -1.54 | 7.70E-22 |
| <i>Pak1</i>     | -0.96 | 1.39E-03 | 3.54  | 7.53E-70 |
| <i>Pak3</i>     | 0.70  | NA       | 3.24  | 6.22E-06 |
| <i>Pak6</i>     | 2.15  | 3.08E-03 | 3.33  | 1.76E-07 |
| <i>Pank1</i>    | 1.03  | 5.26E-02 | -2.30 | 3.06E-09 |
| <i>Pank3</i>    | 0.26  | 4.60E-01 | -1.09 | 1.57E-04 |
| <i>Papss2</i>   | 0.31  | 6.78E-01 | -1.25 | 3.29E-05 |
| <i>Parp1</i>    | 0.41  | 7.47E-02 | -0.73 | 1.35E-05 |
| <i>Parva</i>    | 0.78  | 1.51E-04 | -1.06 | 3.37E-08 |
| <i>Parvg</i>    | -0.45 | 3.95E-01 | 2.28  | 8.69E-08 |
| <i>Pcca</i>     | 0.96  | 1.71E-02 | -1.89 | 4.26E-09 |
| <i>Pccb</i>     | 0.56  | 1.54E-01 | -1.73 | 4.11E-08 |
| <i>Pck1</i>     | 0.41  | 7.51E-01 | -2.08 | 2.77E-04 |
| <i>Pck2</i>     | -0.20 | 7.79E-01 | 2.14  | 2.35E-11 |
| <i>Pcx</i>      | 0.51  | 1.55E-01 | -0.95 | 7.25E-03 |
| <i>Pcyt1a</i>   | 0.62  | 9.66E-06 | -1.42 | 6.99E-27 |
| <i>Pcyt2</i>    | 0.53  | 4.24E-02 | -0.89 | 1.15E-04 |
| <i>Pdgfa</i>    | 0.05  | 9.43E-01 | 1.43  | 3.78E-07 |
| <i>Pdgfb</i>    | 0.38  | 7.12E-01 | 3.09  | 7.49E-10 |
| <i>Pdha1</i>    | 0.31  | 4.66E-01 | -1.22 | 1.78E-04 |
| <i>Pdhb</i>     | 0.73  | 1.96E-04 | -0.77 | 1.01E-03 |
| <i>Pdhx</i>     | 0.33  | 4.09E-01 | -0.89 | 1.00E-03 |
| <i>Pdpk1</i>    | -0.10 | 7.29E-01 | -0.86 | 2.45E-07 |
| <i>Pdxk</i>     | 0.69  | 8.26E-02 | -1.89 | 7.01E-09 |
| <i>Pdxp</i>     | -0.45 | 5.74E-01 | 1.53  | 2.69E-02 |
| <i>Pemt</i>     | 0.85  | 8.82E-03 | -1.58 | 5.26E-07 |
| <i>Pet112l</i>  | 0.78  | 7.56E-03 | -1.36 | 1.07E-07 |
| <i>Pfkfb3</i>   | -0.28 | 6.80E-01 | 1.18  | 4.23E-02 |
| <i>Pfkfb4</i>   | -0.70 | 1.50E-02 | 2.74  | 3.53E-17 |
| <i>Pfkm</i>     | -0.03 | 9.46E-01 | -0.82 | 3.15E-08 |
| <i>Pfkp</i>     | -2.45 | 2.11E-08 | 3.30  | 5.43E-10 |
| <i>Pgap1</i>    | 0.39  | 2.50E-01 | -1.07 | 2.27E-05 |
| <i>Pgd</i>      | -0.07 | 8.57E-01 | 1.67  | 3.00E-16 |
| <i>Pgm1</i>     | -0.46 | 1.93E-01 | 1.85  | 6.63E-13 |
| <i>Pgm3</i>     | -0.66 | 8.96E-02 | 1.12  | 2.31E-03 |
| <i>Pgs1</i>     | -0.08 | 7.76E-01 | 0.72  | 2.19E-03 |
| <i>Phgdh</i>    | -0.53 | 6.46E-01 | 5.01  | 7.51E-15 |
| <i>Phospho1</i> | 1.09  | 2.98E-02 | -2.26 | 1.39E-07 |
| <i>Pi4ka</i>    | 0.41  | 3.03E-02 | -1.08 | 1.16E-06 |
| <i>Pi4kb</i>    | 0.09  | 6.45E-01 | -0.79 | 8.98E-08 |
| <i>Pias4</i>    | -0.10 | 6.02E-01 | -0.66 | 6.31E-06 |
| <i>Piga</i>     | -0.55 | 1.92E-01 | 1.04  | 3.75E-06 |
| <i>Pigp</i>     | -0.07 | 8.95E-01 | 0.79  | 4.86E-03 |

|                |       |          |       |          |
|----------------|-------|----------|-------|----------|
| <i>Pigq</i>    | 0.29  | 3.21E-02 | -0.88 | 1.55E-07 |
| <i>Pigy</i>    | 0.66  | 1.51E-02 | -1.29 | 1.60E-10 |
| <i>Pik3c2b</i> | -0.68 | 5.67E-03 | 0.50  | 9.04E-02 |
| <i>Pik3c3</i>  | 0.24  | 2.46E-01 | -1.01 | 6.91E-10 |
| <i>Pik3cb</i>  | 0.54  | 8.66E-02 | -0.95 | 3.42E-05 |
| <i>Pik3cd</i>  | -0.15 | 7.32E-01 | 1.23  | 3.18E-05 |
| <i>Pik3cg</i>  | 0.33  | 5.59E-01 | 1.22  | 8.80E-04 |
| <i>Pik3r1</i>  | 0.21  | 1.96E-01 | -1.21 | 3.34E-07 |
| <i>Pik3r3</i>  | -0.17 | 6.80E-01 | 1.35  | 1.52E-05 |
| <i>Pik3r5</i>  | -0.06 | 9.44E-01 | 1.67  | 1.06E-03 |
| <i>Pip5k1a</i> | -0.06 | 8.88E-01 | -0.64 | 8.62E-03 |
| <i>Pipox</i>   | 0.51  | 5.56E-02 | -1.60 | 1.28E-12 |
| <i>Pklr</i>    | 0.71  | 2.60E-02 | -0.68 | 4.38E-02 |
| <i>Pkm2</i>    | -1.46 | NA       | 2.48  | 2.66E-03 |
| <i>Pla2g16</i> | -0.34 | 5.12E-01 | 1.00  | 4.80E-03 |
| <i>Pla2g2d</i> | -0.18 | 9.16E-01 | 2.68  | 3.39E-02 |
| <i>Pla2g2e</i> | -0.08 | 9.61E-01 | 5.97  | 2.19E-10 |
| <i>Pla2g4a</i> | -0.19 | 7.18E-01 | 1.02  | 1.40E-02 |
| <i>Pla2g4b</i> | -0.14 | 7.49E-01 | 1.32  | 1.22E-04 |
| <i>Pla2g4c</i> | 0.69  | 4.02E-01 | 2.71  | 5.58E-03 |
| <i>Pla2g4f</i> | -0.31 | 8.00E-01 | 3.00  | 8.90E-03 |
| <i>Pla2g7</i>  | -0.72 | 1.28E-01 | 3.26  | 3.12E-16 |
| <i>Plau</i>    | 0.56  | NA       | 2.20  | 3.35E-03 |
| <i>Plcb2</i>   | 0.17  | 8.26E-01 | 1.21  | 2.45E-03 |
| <i>Plcd3</i>   | -0.98 | 1.08E-01 | 1.48  | 1.46E-02 |
| <i>Plcg1</i>   | 0.14  | 7.42E-01 | -1.09 | 3.46E-04 |
| <i>Plcg2</i>   | 0.15  | 7.98E-01 | 1.12  | 7.36E-03 |
| <i>Plch1</i>   | -0.98 | 8.02E-02 | 4.73  | 2.33E-11 |
| <i>Pld1</i>    | -0.83 | 1.11E-03 | 1.41  | 7.14E-16 |
| <i>Pld3</i>    | -0.72 | 2.20E-03 | 0.94  | 1.20E-07 |
| <i>Pld4</i>    | 0.21  | 6.66E-01 | 1.20  | 1.01E-06 |
| <i>Pmm1</i>    | -0.48 | 5.51E-01 | 1.34  | 4.51E-02 |
| <i>Pmvk</i>    | -0.05 | 9.12E-01 | -0.70 | 3.16E-04 |
| <i>Pnpla3</i>  | -0.53 | 5.16E-01 | 5.10  | 2.88E-30 |
| <i>Pnpo</i>    | 0.54  | 1.44E-01 | -0.93 | 2.97E-04 |
| <i>Pola2</i>   | 0.37  | 2.66E-01 | -0.84 | 2.62E-03 |
| <i>Pold1</i>   | -0.18 | 6.62E-01 | 0.97  | 7.01E-04 |
| <i>Pold4</i>   | -1.57 | 1.12E-06 | 3.24  | 7.17E-35 |
| <i>Pole2</i>   | -0.61 | 2.17E-01 | 1.78  | 1.67E-03 |
| <i>Polg2</i>   | 0.45  | 2.78E-01 | -1.19 | 6.31E-10 |
| <i>Polr1e</i>  | 0.19  | 5.08E-01 | 0.72  | 2.43E-03 |
| <i>Polr2b</i>  | 0.20  | 4.08E-01 | -1.23 | 7.51E-09 |
| <i>Polr2d</i>  | -0.06 | 8.49E-01 | 0.85  | 2.01E-05 |
| <i>Polr2e</i>  | -0.32 | 2.72E-01 | 0.91  | 1.51E-03 |
| <i>Polr2g</i>  | -0.10 | 7.42E-01 | 0.61  | 1.05E-03 |

|                 |       |          |       |          |
|-----------------|-------|----------|-------|----------|
| <i>Polr2h</i>   | -0.32 | 1.07E-01 | 1.00  | 1.01E-04 |
| <i>Polr3d</i>   | -0.10 | 8.32E-01 | 1.14  | 8.51E-05 |
| <i>Polr3g</i>   | 0.21  | 5.85E-01 | -0.83 | 4.16E-07 |
| <i>Pon1</i>     | 1.86  | 4.12E-04 | -3.75 | 1.22E-25 |
| <i>Pon3</i>     | 0.30  | 3.18E-01 | -0.79 | 1.50E-04 |
| <i>Ppap2a</i>   | -0.80 | 1.50E-02 | 0.82  | 2.23E-03 |
| <i>Ppap2b</i>   | 0.41  | 3.50E-01 | -1.53 | 2.88E-07 |
| <i>Ppap2c</i>   | -0.55 | 3.82E-02 | 2.01  | 4.38E-18 |
| <i>Pparg</i>    | 1.14  | 2.22E-03 | -0.28 | 3.99E-01 |
| <i>Ppargc1a</i> | 0.01  | 9.89E-01 | -1.35 | 1.75E-03 |
| <i>Ppcdc</i>    | -0.47 | 3.79E-02 | 1.01  | 6.89E-06 |
| <i>Ppp1cb</i>   | 0.30  | 8.63E-02 | -0.64 | 2.92E-04 |
| <i>Ppp1r12b</i> | -0.01 | 9.85E-01 | -1.52 | 1.24E-05 |
| <i>Ppp1r12c</i> | -0.36 | 4.15E-02 | 0.89  | 7.10E-06 |
| <i>Ppp2r1b</i>  | 0.43  | 1.38E-01 | -1.29 | 6.62E-13 |
| <i>Ppp2r2b</i>  | -0.21 | 8.52E-01 | 1.99  | 9.87E-03 |
| <i>Ppp2r2c</i>  | -1.48 | 1.19E-01 | 2.35  | 4.17E-02 |
| <i>Ppp2r3a</i>  | 0.43  | 1.44E-02 | -0.62 | 5.49E-04 |
| <i>Ppp2r5a</i>  | 0.37  | 3.74E-02 | -1.40 | 3.41E-16 |
| <i>Ppp2r5b</i>  | -0.14 | 6.91E-01 | 0.75  | 1.61E-03 |
| <i>Ppt1</i>     | -0.30 | 4.23E-02 | 0.69  | 2.20E-07 |
| <i>Prdx6</i>    | 0.39  | 1.92E-01 | -0.71 | 5.05E-03 |
| <i>Rhoxnb</i>   | 0.58  | 1.14E-01 | -2.27 | 3.22E-15 |
| <i>Prim2</i>    | -0.27 | 4.46E-01 | 0.69  | 2.30E-02 |
| <i>Prkaa2</i>   | 1.03  | 1.63E-10 | -1.60 | 1.76E-18 |
| <i>Prkab1</i>   | -0.48 | 2.07E-02 | 1.44  | 2.72E-11 |
| <i>Prkab2</i>   | 0.20  | 7.12E-01 | 1.01  | 5.25E-03 |
| <i>Prkag2</i>   | 0.06  | 8.33E-01 | -0.86 | 2.15E-05 |
| <i>Prkag3</i>   | -0.51 | 6.35E-01 | -1.62 | 1.91E-02 |
| <i>Prkca</i>    | -0.42 | 1.58E-01 | 1.60  | 3.29E-12 |
| <i>Prkcc</i>    | -0.81 | 3.45E-01 | 1.88  | 1.36E-02 |
| <i>Prodh</i>    | 2.17  | 3.55E-06 | -3.66 | 4.88E-22 |
| <i>Prom1</i>    | -1.95 | 8.64E-06 | 4.95  | 1.18E-29 |
| <i>Psat1</i>    | -1.71 | 4.46E-04 | 5.57  | 8.81E-57 |
| <i>Psph</i>     | -0.45 | 2.04E-01 | 1.67  | 1.28E-12 |
| <i>Ptdss1</i>   | 0.37  | 2.26E-01 | -1.24 | 1.20E-13 |
| <i>Pten</i>     | 0.02  | 9.64E-01 | -0.99 | 1.19E-12 |
| <i>Ptgds</i>    | 2.53  | NA       | -1.74 | 2.68E-02 |
| <i>Ptges</i>    | -0.23 | 8.80E-01 | 4.41  | 3.78E-10 |
| <i>Ptgs2</i>    | -1.90 | 2.22E-03 | 3.03  | 1.47E-04 |
| <i>Pxn</i>      | -0.82 | 3.86E-07 | 0.58  | 1.16E-03 |
| <i>Pycr1</i>    | -0.78 | 2.93E-01 | 1.66  | 1.63E-02 |
| <i>Pygb</i>     | -0.85 | 1.11E-01 | 3.25  | 2.35E-29 |
| <i>Pygl</i>     | 0.31  | 5.19E-01 | -1.59 | 4.10E-18 |
| <i>Qdpr</i>     | 0.54  | 3.22E-01 | -1.34 | 2.11E-06 |

|                |       |          |       |          |
|----------------|-------|----------|-------|----------|
| <i>Qprt</i>    | -0.20 | 7.13E-01 | -0.70 | 3.37E-03 |
| <i>Rab10</i>   | 0.43  | 4.29E-03 | -0.67 | 3.43E-11 |
| <i>Rab14</i>   | 0.07  | 8.30E-01 | -0.71 | 4.75E-05 |
| <i>Rac2</i>    | -0.10 | 8.55E-01 | 1.10  | 1.62E-03 |
| <i>Raf1</i>    | 0.22  | 1.71E-01 | -0.65 | 7.69E-08 |
| <i>Rbl1</i>    | -0.32 | 5.22E-01 | 1.56  | 2.63E-07 |
| <i>Rdh10</i>   | 0.38  | 1.42E-01 | -0.87 | 2.72E-09 |
| <i>Rdh12</i>   | -0.96 | 2.50E-01 | 2.03  | 2.64E-02 |
| <i>Rdh16</i>   | 1.90  | 1.09E-05 | -2.96 | 1.51E-66 |
| <i>Rdh5</i>    | -1.18 | 1.18E-02 | 1.54  | 1.51E-05 |
| <i>Rdh9</i>    | -2.43 | 3.38E-07 | 1.28  | 6.31E-04 |
| <i>Relb</i>    | 0.01  | 9.91E-01 | 2.60  | 1.80E-20 |
| <i>Retsat</i>  | 2.13  | 1.57E-08 | -4.14 | 8.49E-34 |
| <i>Rev3l</i>   | 0.17  | 4.40E-01 | -0.83 | 5.98E-07 |
| <i>Rgn</i>     | 1.93  | 2.72E-04 | -3.39 | 7.58E-16 |
| <i>Rpe</i>     | 0.33  | 1.10E-01 | -0.77 | 3.76E-06 |
| <i>Rpia</i>    | 0.21  | 5.68E-01 | 1.05  | 1.46E-04 |
| <i>Rptor</i>   | -0.07 | 8.45E-01 | -0.74 | 5.51E-06 |
| <i>Rrm2</i>    | 0.50  | 4.47E-01 | 1.86  | 3.61E-06 |
| <i>Sardh</i>   | 0.52  | 2.44E-01 | -1.83 | 6.57E-12 |
| <i>Sat1</i>    | -0.32 | 4.53E-01 | 1.05  | 5.77E-03 |
| <i>Scd2</i>    | -1.43 | 4.12E-04 | 5.52  | 3.81E-91 |
| <i>Scly</i>    | -0.04 | 9.42E-01 | -0.63 | 3.00E-03 |
| <i>Scp2</i>    | 1.18  | 1.50E-04 | -2.63 | 1.16E-32 |
| <i>Sdha</i>    | 0.57  | 4.59E-02 | -1.74 | 8.35E-31 |
| <i>Sdhb</i>    | 0.30  | 4.66E-01 | -0.73 | 1.24E-03 |
| <i>Sdhd</i>    | 0.19  | 6.45E-01 | -0.96 | 2.62E-07 |
| <i>Sds</i>     | 0.25  | 8.33E-01 | -1.41 | 7.60E-08 |
| <i>Sdsl</i>    | -0.53 | 1.03E-02 | 0.74  | 1.31E-03 |
| <i>Sephs2</i>  | 0.56  | 1.70E-01 | -1.54 | 1.22E-09 |
| <i>Sgms2</i>   | 0.25  | 2.89E-01 | -1.44 | 2.71E-13 |
| <i>Shc2</i>    | -0.40 | 6.05E-01 | 6.89  | 1.35E-53 |
| <i>Shc4</i>    | -0.07 | 9.61E-01 | 1.66  | 2.56E-02 |
| <i>Shmt1</i>   | 0.26  | 4.88E-01 | -1.13 | 1.13E-05 |
| <i>Shmt2</i>   | 0.38  | 2.21E-01 | -1.01 | 1.02E-13 |
| <i>Sirt1</i>   | 0.27  | 1.87E-01 | -0.67 | 6.98E-05 |
| <i>Slc27a5</i> | 0.71  | 3.19E-01 | -2.23 | 4.99E-13 |
| <i>Smad3</i>   | -0.47 | 9.33E-02 | 0.68  | 8.99E-03 |
| <i>Smad9</i>   | 2.50  | 3.65E-04 | -3.36 | 8.63E-04 |
| <i>Smpd2</i>   | 0.57  | 2.31E-02 | -0.85 | 7.54E-07 |
| <i>Smpd3</i>   | -1.34 | 6.77E-04 | 3.82  | 3.87E-51 |
| <i>Smurf2</i>  | 0.16  | 4.72E-01 | -0.65 | 2.49E-03 |
| <i>Sord</i>    | 0.64  | 2.82E-01 | -1.23 | 7.32E-03 |
| <i>Sos1</i>    | 0.33  | 2.89E-02 | -1.33 | 9.37E-24 |
| <i>Sos2</i>    | 0.05  | 9.06E-01 | -0.70 | 4.42E-06 |

|                  |       |          |       |          |
|------------------|-------|----------|-------|----------|
| <i>Sphk1</i>     | -0.42 | 6.34E-01 | 2.29  | 2.76E-03 |
| <i>Sphk2</i>     | 0.16  | 6.32E-01 | -1.26 | 9.94E-13 |
| <i>Spp1</i>      | 0.42  | 7.61E-01 | 3.49  | 1.83E-05 |
| <i>Sptlc2</i>    | -0.76 | 2.20E-02 | 1.58  | 8.99E-11 |
| <i>Sqle</i>      | -0.59 | 1.07E-01 | 0.76  | 1.47E-02 |
| <i>Src</i>       | 0.27  | 7.31E-01 | 2.26  | 1.88E-07 |
| <i>Srd5a1</i>    | 1.73  | 1.69E-07 | -3.01 | 1.45E-41 |
| <i>Srd5a2</i>    | -0.73 | 3.76E-02 | 0.96  | 1.92E-03 |
| <i>Srebf1</i>    | -0.06 | 9.11E-01 | -0.77 | 1.24E-02 |
| <i>Srm</i>       | 0.02  | 9.75E-01 | 1.16  | 8.53E-05 |
| <i>St3gal2</i>   | -0.92 | 4.36E-02 | 2.12  | 3.16E-11 |
| <i>St6galnac</i> | -1.20 | 1.90E-02 | 2.12  | 8.23E-05 |
| <i>St6galnac</i> | -0.41 | 1.75E-01 | -0.66 | 7.26E-03 |
| <i>Strada</i>    | -0.10 | 8.19E-01 | 0.78  | 1.84E-04 |
| <i>Stradb</i>    | 0.82  | 1.25E-03 | -1.09 | 8.72E-07 |
| <i>Sucla2</i>    | 0.63  | 1.23E-02 | -1.57 | 1.60E-14 |
| <i>Suclg2</i>    | 1.02  | 9.03E-05 | -0.95 | 8.64E-04 |
| <i>Sult1a1</i>   | 0.49  | 5.01E-01 | 0.76  | 3.76E-02 |
| <i>Sult1e1</i>   | 2.45  | NA       | 5.34  | 5.23E-07 |
| <i>Sult2a1</i>   | -1.27 | 1.80E-01 | 3.94  | 1.03E-03 |
| <i>Sult2b1</i>   | -1.14 | 5.19E-02 | 4.36  | 9.91E-14 |
| <i>Syk</i>       | -0.24 | 6.64E-01 | 1.38  | 5.26E-04 |
| <i>Synj2</i>     | -0.47 | 3.06E-02 | 2.85  | 2.30E-29 |
| <i>Tab1</i>      | -0.62 | 4.44E-02 | 1.05  | 2.59E-05 |
| <i>Tab2</i>      | -0.15 | 6.39E-01 | -0.83 | 1.49E-03 |
| <i>Tab3</i>      | -0.01 | 9.83E-01 | -0.64 | 3.22E-03 |
| <i>Tat</i>       | 0.36  | 6.34E-01 | -1.80 | 5.49E-05 |
| <i>Tbc1d1</i>    | -0.40 | 2.88E-01 | 0.90  | 1.21E-02 |
| <i>Tbxas1</i>    | -0.43 | 2.99E-01 | 1.09  | 9.54E-03 |
| <i>Tdo2</i>      | 0.02  | 9.83E-01 | -1.51 | 5.24E-05 |
| <i>Tgds</i>      | 0.23  | 5.28E-01 | -1.07 | 1.91E-05 |
| <i>Tgfb1</i>     | -0.53 | 2.72E-01 | 1.23  | 4.48E-03 |
| <i>Tgfb2</i>     | 0.16  | 8.89E-01 | 2.99  | 8.06E-11 |
| <i>Tgfb3</i>     | -0.62 | 2.93E-01 | 2.35  | 7.57E-06 |
| <i>Tgfbr2</i>    | -1.00 | 5.16E-03 | 1.79  | 2.26E-07 |
| <i>Tgif1</i>     | -0.46 | 1.06E-01 | 1.16  | 7.04E-05 |
| <i>Tgif2</i>     | -0.09 | 8.27E-01 | 0.99  | 2.41E-03 |
| <i>Thbs1</i>     | -1.10 | 1.08E-01 | 3.71  | 1.30E-12 |
| <i>Thbs3</i>     | -0.18 | 8.45E-01 | 1.54  | 1.53E-02 |
| <i>Thtpa</i>     | 0.80  | 3.25E-03 | -1.17 | 2.58E-04 |
| <i>Ticam2</i>    | 0.00  | 9.99E-01 | 1.67  | 4.76E-03 |
| <i>Tirap</i>     | -0.16 | 6.45E-01 | -0.64 | 1.94E-02 |
| <i>Tk1</i>       | 0.76  | 2.76E-02 | -1.30 | 1.37E-06 |
| <i>Tln2</i>      | 0.21  | 7.90E-01 | -1.71 | 2.62E-04 |
| <i>Tlr4</i>      | -0.11 | 8.33E-01 | 0.94  | 1.50E-02 |

|                  |       |          |       |          |
|------------------|-------|----------|-------|----------|
| <i>Tm7sf2</i>    | 0.41  | 4.63E-01 | -1.35 | 1.03E-05 |
| <i>Tnc</i>       | -0.86 | 2.07E-01 | 2.89  | 1.01E-06 |
| <i>Tnf</i>       | -0.20 | 8.36E-01 | 3.43  | 7.41E-07 |
| <i>Tnfaip3</i>   | 0.32  | 6.39E-01 | 1.33  | 9.98E-05 |
| <i>Tnfrsf11a</i> | -0.15 | 8.55E-01 | 1.57  | 4.04E-04 |
| <i>Tnfsf13b</i>  | 0.31  | 7.48E-01 | 2.07  | 4.82E-03 |
| <i>Traf1</i>     | -0.11 | 9.11E-01 | 2.54  | 9.00E-05 |
| <i>Traf5</i>     | -0.43 | 5.63E-02 | 0.81  | 3.06E-04 |
| <i>Traf6</i>     | 0.27  | 2.89E-01 | -1.02 | 6.75E-07 |
| <i>Treh</i>      | 1.44  | 4.49E-02 | 0.12  | 8.78E-01 |
| <i>Trim25</i>    | 0.24  | 3.09E-01 | -0.82 | 1.84E-05 |
| <i>Tsc1</i>      | -0.14 | 6.95E-01 | -0.84 | 9.88E-07 |
| <i>Tsc2</i>      | -0.04 | 8.36E-01 | -0.79 | 1.04E-05 |
| <i>Tst</i>       | 0.08  | 9.00E-01 | -0.92 | 3.90E-03 |
| <i>Tymp</i>      | -0.05 | 9.55E-01 | -2.75 | 1.14E-10 |
| <i>Uap1l1</i>    | -0.55 | 6.45E-02 | 3.19  | 4.49E-41 |
| <i>Uck1</i>      | 0.09  | 8.06E-01 | -0.97 | 6.31E-10 |
| <i>Ugdh</i>      | 0.94  | 1.24E-03 | 0.02  | 9.57E-01 |
| <i>Ugt1a1</i>    | 0.76  | 2.61E-01 | -2.81 | 2.85E-08 |
| <i>Ugt1a10</i>   | 2.36  | 4.01E-04 | -3.43 | 8.01E-06 |
| <i>Ugt1a5</i>    | 0.98  | 1.21E-01 | -1.94 | 1.86E-04 |
| <i>Ugt1a6a</i>   | 0.79  | 1.49E-01 | -2.21 | 1.33E-05 |
| <i>Ugt1a6b</i>   | 0.60  | 2.79E-01 | -2.23 | 4.10E-06 |
| <i>Ugt1a9</i>    | 2.80  | 8.92E-07 | -4.89 | 1.07E-64 |
| <i>Ugt2a3</i>    | 0.68  | 2.33E-01 | -1.94 | 2.17E-09 |
| <i>Ugt2b1</i>    | 1.08  | 3.88E-02 | -3.25 | 2.17E-41 |
| <i>Ugt2b34</i>   | 0.80  | 1.17E-03 | -1.34 | 9.11E-10 |
| <i>Ugt2b35</i>   | 0.71  | 1.06E-02 | -0.91 | 1.73E-03 |
| <i>Ugt2b36</i>   | 0.74  | 8.77E-02 | -1.19 | 2.28E-04 |
| <i>Ugt2b37</i>   | 2.76  | NA       | -1.86 | 2.67E-05 |
| <i>Ugt2b5</i>    | 1.28  | 6.01E-06 | -1.92 | 5.96E-18 |
| <i>Uox</i>       | 0.09  | 9.33E-01 | -0.90 | 7.62E-03 |
| <i>Upb1</i>      | 0.40  | 4.91E-01 | -0.96 | 4.32E-03 |
| <i>Upp1</i>      | -0.33 | NA       | 1.72  | 4.97E-03 |
| <i>Upp2</i>      | 1.64  | 2.61E-02 | -3.56 | NA       |
| <i>Uqcrc1</i>    | 0.40  | 1.05E-01 | -0.86 | 7.85E-06 |
| <i>Uqcrc2</i>    | 0.53  | 2.99E-02 | -1.10 | 5.24E-09 |
| <i>Uqcrfs1</i>   | 0.48  | 1.19E-01 | -0.81 | 3.05E-05 |
| <i>Uroc1</i>     | -0.49 | 6.03E-01 | -0.62 | 1.69E-02 |
| <i>Urod</i>      | 0.17  | 6.00E-01 | -0.63 | 1.08E-04 |
| <i>Vasp</i>      | -0.64 | 8.31E-04 | 1.62  | 3.76E-27 |
| <i>Vav1</i>      | -0.16 | 7.78E-01 | 1.38  | 6.97E-05 |
| <i>Vav2</i>      | -0.04 | 9.48E-01 | -0.97 | 6.69E-03 |
| <i>Vav3</i>      | -1.34 | 5.43E-08 | 2.42  | 6.82E-13 |
| <i>Vcam1</i>     | -0.97 | 8.18E-04 | 3.06  | 6.25E-30 |



|               |       |          |       |          |
|---------------|-------|----------|-------|----------|
| <i>Vegfc</i>  | -0.24 | 5.34E-01 | 0.77  | 1.34E-02 |
| <i>Vtn</i>    | 0.34  | 9.57E-02 | -0.81 | 1.47E-05 |
| <i>Xdh</i>    | 0.39  | 2.76E-01 | -1.24 | 1.99E-08 |
| <i>Xiap</i>   | -0.13 | 5.76E-01 | -0.69 | 4.09E-04 |
| <i>Xylb</i>   | 0.53  | 2.62E-02 | -0.93 | 2.03E-06 |
| <i>Zap70</i>  | -3.63 | 2.15E-16 | 1.49  | 2.57E-03 |
| <i>Zfyve9</i> | 0.10  | 8.25E-01 | -0.79 | 1.08E-02 |
